# Supplementary material for: A quantum chemical study on the anti-SARS-CoV-2 activity of TMPRSS2 inhibitors
Source: Royal Society of Chemistry journal article supplement (doi:10.1039/d3cp01723k), 2023-01-01
Supplement: d3cp01723k1.pdf [file d3cp01723k1.pdf]

## Electronic Supplementary Information

# A Quantum Chemical Study on the Anti-SARS-CoV-2 Activity of TMPRSS2 Inhibitors

*Akihiro Kondo<sup>1</sup>, Kazuhiro J. Fujimoto<sup>1,2\*</sup>, and Takeshi Yanai<sup>1,2\*</sup>*

<sup>1</sup> Department of Chemistry, Graduate School of Science, Nagoya University, Furocho, Chikusa, Nagoya, 464-8601, Japan

<sup>2</sup> Institute of Transformative Bio-Molecules (WPI-ITbM), Nagoya University, Furocho, Chikusa, Nagoya 464-8601, Japan

### Corresponding Authors

Kazuhiro J. Fujimoto: [fujimotok@chem.nagoya-u.ac.jp](mailto:fujimotok@chem.nagoya-u.ac.jp)

Takeshi Yanai: [yanait@chem.nagoya-u.ac.jp](mailto:yanait@chem.nagoya-u.ac.jp)

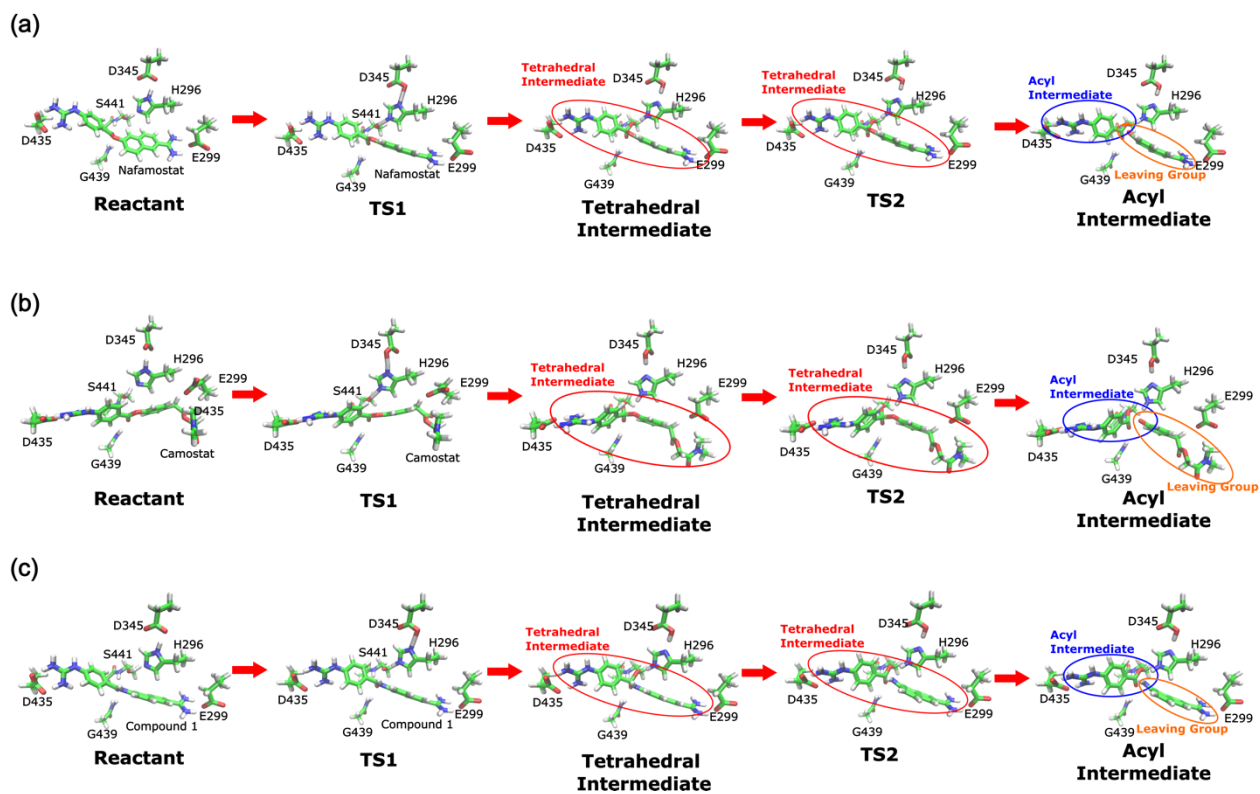

**Fig. S1** Optimized structures of (a) nafamostat, (b) camostat, and (c) compound **1** by the cluster + PCM model. The five states in the acylation reaction (reactants, TS1, tetrahedral intermediates, TS2, and acyl intermediates) are shown.

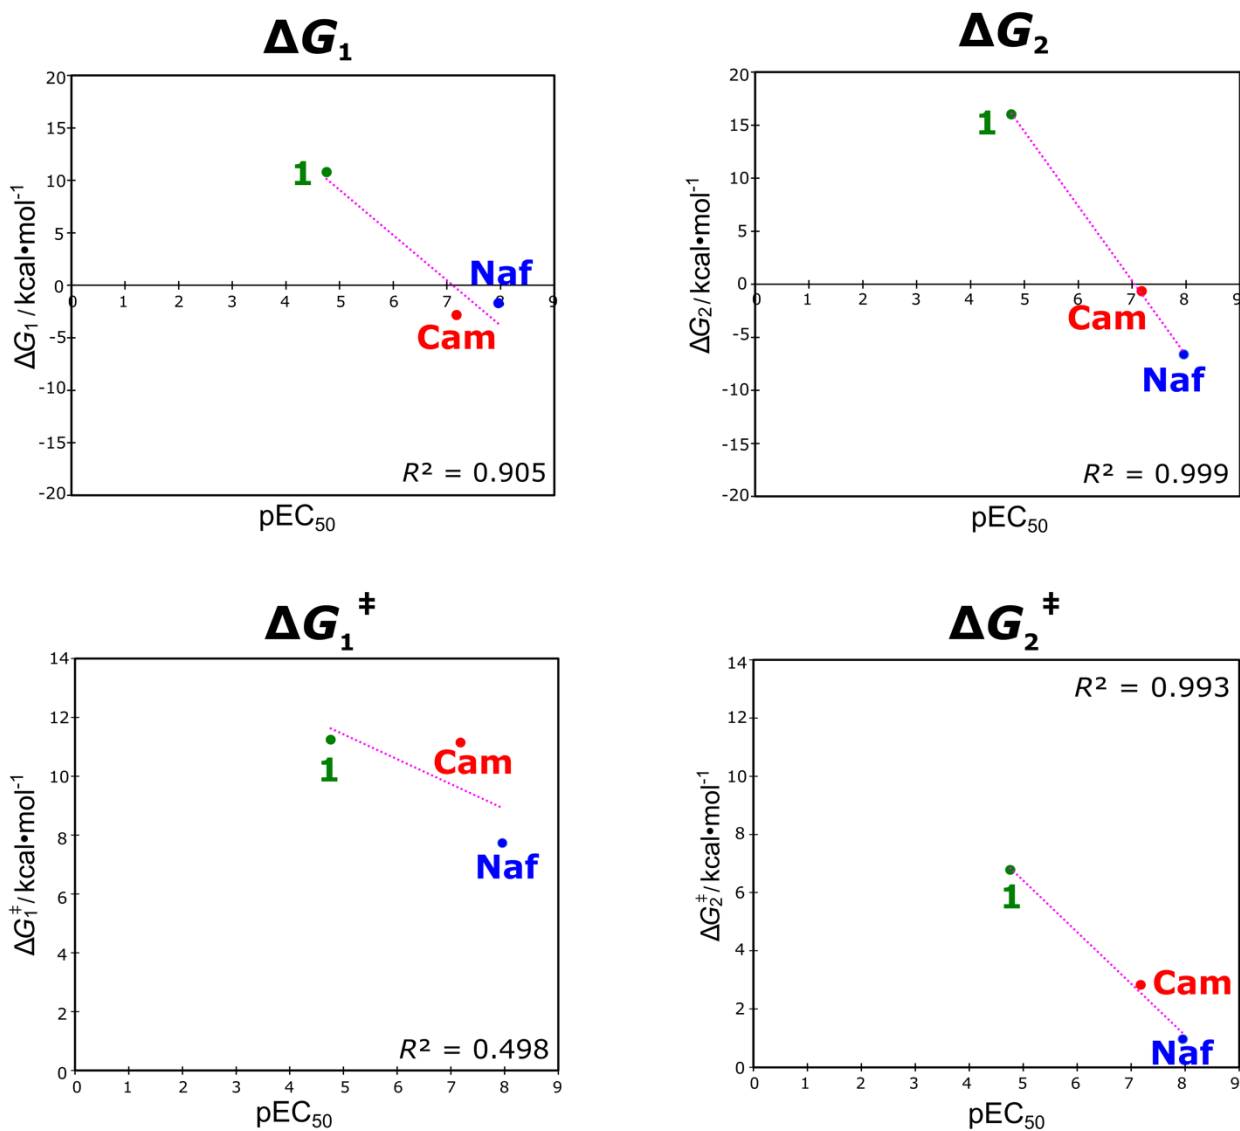

**Fig. S2** Scatter plots between the experimental pEC<sub>50</sub> and the free energy difference ( $\Delta G_1$ ,  $\Delta G_2$ ,  $\Delta G_1^\ddagger$ , and  $\Delta G_2^\ddagger$ ). In the figure, nafamostat, camostat, and compound **1** are abbreviated as Naf, Cam, and **1**, respectively.

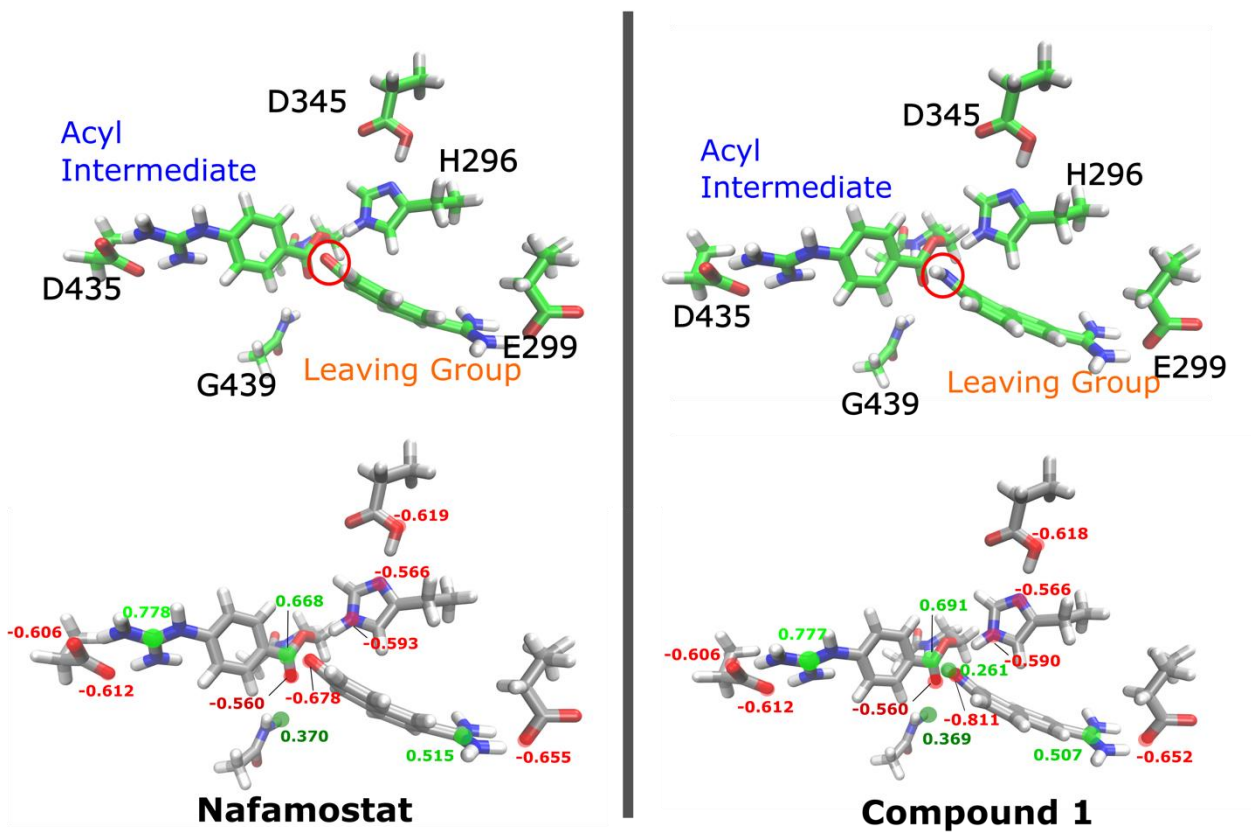

**Fig. S3** Mulliken charge distribution calculated for nafamostat and compound **1** (in a.u.). Acyl intermediates, leaving groups, and surrounding amino acids (Asp345, His296, Ser441, Asp435, Glu299, and Gly439) are shown.

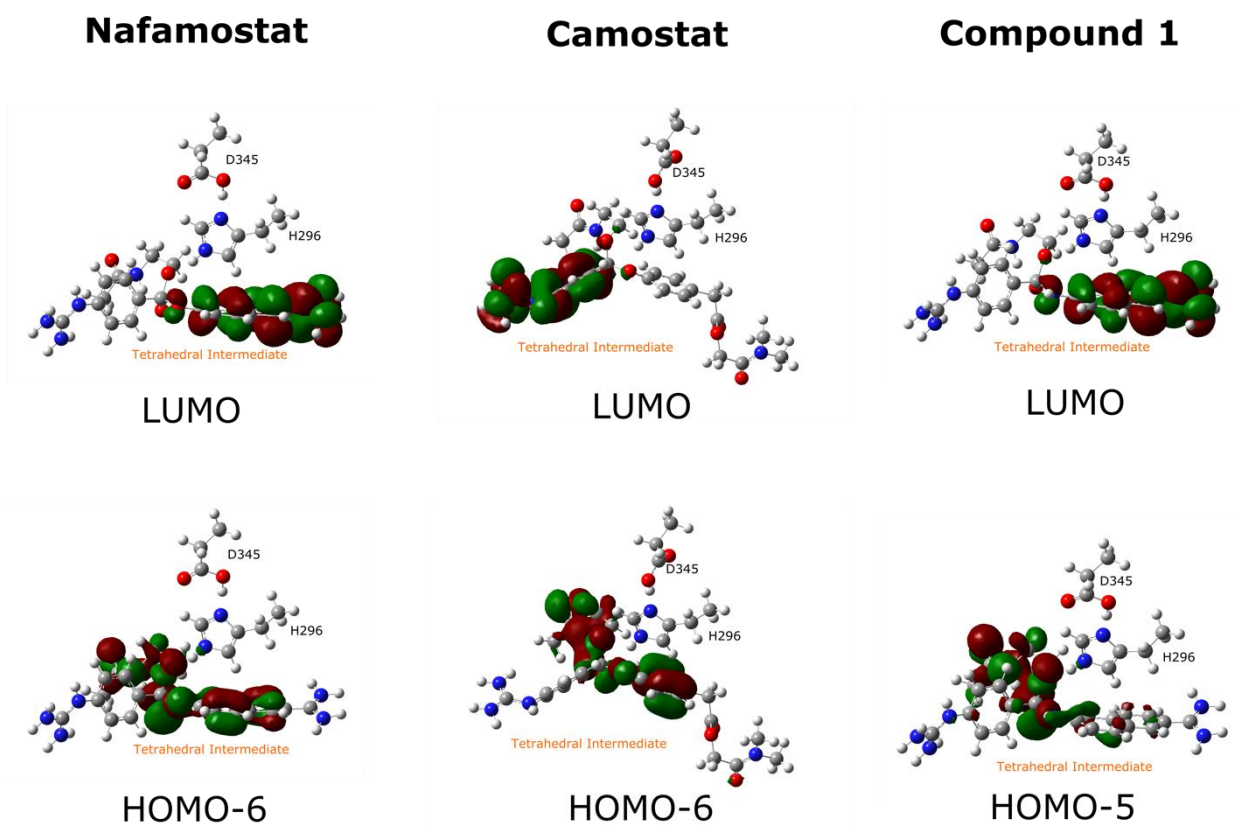

**Fig. S4** Shape of molecular orbitals of tetrahedral intermediates involved in the acylation. The LUMO and HOMO-6 for nafamostat and camostat, and LUMO and HOMO-5 for compound **1** are illustrated.

## Detailed energy data

**Table S1** Comparison of activation energies ( $\Delta G_1^\ddagger$ ) calculated by the cluster + PCM model (kcal/mol)<sup>a</sup>.

|                   | B3LYP-GD3BJ | M062X | APFD |
|-------------------|-------------|-------|------|
| Nafamostat        | 7.74        | 7.79  | 6.48 |
| Camostat          | 11.15       | 12.38 | 9.15 |
| Compound <b>1</b> | 11.24       | 13.27 | 9.26 |

<sup>a</sup> The 6-31G(d) basis set was used.

**Table S2** Free energies of TMPRSS2 inhibitors calculated by the cluster + PCM model (a.u.)<sup>a</sup>.

|                   | Reactant    | TS1         | Tetrahedral Intermediate | TS2         | Acyl Intermediate |
|-------------------|-------------|-------------|--------------------------|-------------|-------------------|
| Nafamostat        | -2879.26175 | -2879.24942 | -2879.26449              | -2879.26296 | -2879.27232       |
| Camostat          | -3090.74045 | -3090.72269 | -3090.74501              | -3090.74050 | -3090.74150       |
| Compound <b>1</b> | -2859.39580 | -2859.37788 | -2859.37865              | -2859.36786 | -2859.37030       |

<sup>a</sup> B3LYP-GD3BJ/6-31G(d) was used.

**Table S3** Electronic energies of TMPRSS2 inhibitors calculated by the ONIOM method (a.u.)<sup>a</sup>.

|                   | Reactant    | Tetrahedral Intermediate | Acyl Intermediate |
|-------------------|-------------|--------------------------|-------------------|
| Nafamostat        | -2879.82236 | -2879.84543              | -2879.85897       |
| Camostat          | -3091.29498 | -3091.31997              | -3091.30899       |
| Compound <b>1</b> | -2859.99456 | -2859.97476              | -2859.96946       |

<sup>a</sup> B3LYP-GD3BJ/6-31G(d) was used.

## Atomic coordinates of optimized structures

### Nafamostat (reactant)

|   |         |         |        |
|---|---------|---------|--------|
| C | 5.179   | -9.257  | 76.286 |
| H | 4.695   | -9.184  | 77.269 |
| H | 5.276   | -10.327 | 76.065 |
| N | 3.568   | -7.489  | 75.546 |
| H | 3.579   | -6.965  | 76.486 |
| C | 4.260   | -8.647  | 75.272 |
| C | 2.766   | -7.228  | 74.497 |
| H | 2.093   | -6.384  | 74.493 |
| N | 2.898   | -8.144  | 73.536 |
| C | 3.836   | -9.041  | 74.019 |
| H | 4.130   | -9.911  | 73.449 |
| C | 10.495  | -11.763 | 76.737 |
| H | 9.899   | -11.216 | 77.480 |
| H | 10.856  | -12.677 | 77.221 |
| C | 9.596   | -12.168 | 75.564 |
| H | 9.206   | -11.268 | 75.074 |
| H | 8.732   | -12.729 | 75.945 |
| C | 10.331  | -13.083 | 74.559 |
| O | 10.379  | -12.672 | 73.327 |
| O | 10.824  | -14.134 | 74.979 |
| C | 2.240   | -4.826  | 79.195 |
| H | 1.566   | -3.995  | 78.959 |
| H | 1.680   | -5.507  | 79.854 |
| C | 2.546   | -5.570  | 77.881 |
| O | 1.792   | -5.377  | 76.903 |
| O | 3.570   | -6.337  | 77.910 |
| C | -10.071 | -8.605  | 67.047 |
| H | -9.652  | -9.081  | 66.156 |
| H | -11.152 | -8.790  | 67.059 |
| C | -9.423  | -9.221  | 68.291 |
| O | -8.521  | -10.090 | 68.111 |
| O | -9.792  | -8.747  | 69.409 |
| O | 0.666   | -11.251 | 64.082 |
| N | 0.555   | -10.300 | 66.163 |
| H | 0.262   | -10.328 | 67.130 |
| O | 0.765   | -4.297  | 67.612 |
| N | 0.991   | -6.188  | 68.822 |
| H | 0.818   | -7.191  | 68.796 |
| C | 2.478   | -6.969  | 70.600 |
| H | 3.215   | -6.593  | 71.322 |
| H | 3.028   | -7.607  | 69.880 |
| O | 1.476   | -7.706  | 71.263 |
| H | 1.895   | -7.976  | 72.142 |
| C | -2.017  | -8.313  | 70.176 |
| C | -3.297  | -7.941  | 70.569 |

|   |         |         |        |
|---|---------|---------|--------|
| C | -4.185  | -8.907  | 71.056 |
| C | -3.779  | -10.240 | 71.189 |
| C | -2.494  | -10.609 | 70.807 |
| C | -1.616  | -9.652  | 70.283 |
| C | -0.265  | -10.016 | 69.806 |
| O | 0.354   | -9.400  | 68.958 |
| O | 0.187   | -11.152 | 70.404 |
| C | 1.542   | -11.479 | 70.423 |
| C | 2.514   | -10.514 | 70.493 |
| C | 3.859   | -10.901 | 70.677 |
| C | 4.188   | -12.286 | 70.825 |
| C | 3.147   | -13.248 | 70.716 |
| C | 1.844   | -12.856 | 70.508 |
| C | 5.523   | -12.639 | 71.144 |
| C | 6.497   | -11.665 | 71.287 |
| C | 6.176   | -10.297 | 71.062 |
| C | 4.890   | -9.928  | 70.771 |
| C | 7.838   | -12.004 | 71.793 |
| N | 8.520   | -11.120 | 72.503 |
| N | 8.386   | -13.197 | 71.582 |
| N | -5.505  | -8.531  | 71.426 |
| C | -6.631  | -9.000  | 70.794 |
| N | -7.818  | -8.532  | 71.158 |
| N | -6.546  | -9.936  | 69.856 |
| H | -1.319  | -7.574  | 69.801 |
| H | -3.617  | -6.907  | 70.481 |
| H | -4.466  | -10.972 | 71.598 |
| H | -2.169  | -11.637 | 70.916 |
| H | 2.238   | -9.469  | 70.504 |
| H | 3.388   | -14.302 | 70.819 |
| H | 1.039   | -13.580 | 70.444 |
| H | 5.751   | -13.681 | 71.346 |
| H | 6.955   | -9.546  | 71.121 |
| H | 4.640   | -8.883  | 70.633 |
| H | 8.038   | -10.307 | 72.860 |
| H | 7.981   | -13.844 | 70.924 |
| H | 9.273   | -13.399 | 72.079 |
| H | -7.880  | -7.849  | 71.899 |
| H | -8.666  | -8.700  | 70.525 |
| H | -5.636  | -10.118 | 69.456 |
| H | -7.399  | -10.118 | 69.237 |
| H | -5.602  | -7.627  | 71.870 |
| H | 9.416   | -11.514 | 72.960 |
| C | -9.796  | -7.087  | 67.059 |
| H | -8.753  | -6.936  | 67.244 |
| H | -10.065 | -6.622  | 66.134 |
| H | -10.365 | -6.653  | 67.855 |
| C | 3.500   | -4.321  | 79.917 |
| H | 3.211   | -3.639  | 80.690 |



|   |        |         |        |
|---|--------|---------|--------|
| H | 4.044  | -5.136  | 80.345 |
| H | 4.119  | -3.811  | 79.207 |
| C | 11.695 | -10.905 | 76.303 |
| H | 12.275 | -10.665 | 77.170 |
| H | 12.297 | -11.465 | 75.617 |
| H | 11.364 | -10.004 | 75.834 |
| C | 6.600  | -8.655  | 76.397 |
| H | 6.588  | -7.615  | 76.651 |
| H | 7.103  | -9.203  | 77.167 |
| H | 7.118  | -8.790  | 75.470 |
| C | 1.932  | -5.784  | 69.825 |
| H | 1.229  | -5.227  | 70.408 |
| H | 2.781  | -5.170  | 69.607 |
| C | 0.549  | -5.492  | 67.754 |
| C | -0.280 | -6.028  | 66.572 |
| H | -1.098 | -5.365  | 66.380 |
| H | 0.340  | -6.091  | 65.702 |
| H | -0.657 | -7.000  | 66.812 |
| C | 0.239  | -11.206 | 65.233 |
| C | -0.751 | -12.368 | 65.438 |
| H | -1.582 | -12.249 | 64.774 |
| H | -0.260 | -13.296 | 65.232 |
| H | -1.100 | -12.365 | 66.450 |
| H | 1.250  | -9.608  | 65.918 |

Nafamostat (TS1)

|   |        |         |        |
|---|--------|---------|--------|
| C | 5.170  | -9.235  | 76.234 |
| H | 4.661  | -9.201  | 77.205 |
| H | 5.259  | -10.295 | 75.966 |
| N | 3.519  | -7.464  | 75.582 |
| H | 3.530  | -6.964  | 76.571 |
| C | 4.260  | -8.574  | 75.231 |
| C | 2.715  | -7.144  | 74.564 |
| H | 2.014  | -6.325  | 74.607 |
| N | 2.897  | -7.993  | 73.545 |
| C | 3.867  | -8.898  | 73.949 |
| H | 4.190  | -9.702  | 73.307 |
| C | 10.503 | -11.802 | 76.681 |
| H | 9.729  | -11.218 | 77.199 |
| H | 10.842 | -12.583 | 77.368 |
| C | 9.913  | -12.490 | 75.448 |
| H | 9.608  | -11.745 | 74.703 |
| H | 9.001  | -13.043 | 75.719 |
| C | 10.891 | -13.513 | 74.811 |
| O | 10.791 | -13.686 | 73.526 |
| O | 11.672 | -14.122 | 75.547 |
| C | 2.234  | -4.820  | 79.199 |
| H | 1.564  | -3.984  | 78.968 |

|   |         |         |        |
|---|---------|---------|--------|
| H | 1.674   | -5.498  | 79.861 |
| C | 2.518   | -5.564  | 77.885 |
| O | 1.773   | -5.354  | 76.904 |
| O | 3.520   | -6.366  | 77.910 |
| C | -10.016 | -8.620  | 67.063 |
| H | -9.718  | -9.064  | 66.109 |
| H | -11.069 | -8.860  | 67.250 |
| C | -9.121  | -9.174  | 68.176 |
| O | -8.076  | -9.794  | 67.817 |
| O | -9.434  | -8.864  | 69.364 |
| O | 0.666   | -11.251 | 64.082 |
| N | 0.555   | -10.300 | 66.163 |
| H | 0.285   | -10.354 | 67.136 |
| O | 0.765   | -4.297  | 67.612 |
| N | 0.991   | -6.188  | 68.822 |
| H | 0.872   | -7.198  | 68.759 |
| C | 2.491   | -6.999  | 70.590 |
| H | 3.334   | -6.619  | 71.198 |
| H | 2.955   | -7.647  | 69.815 |
| O | 1.598   | -7.699  | 71.390 |
| H | 2.263   | -7.932  | 72.525 |
| C | -1.339  | -7.690  | 70.822 |
| C | -2.694  | -7.412  | 70.992 |
| C | -3.648  | -8.431  | 70.881 |
| C | -3.237  | -9.740  | 70.601 |
| C | -1.886  | -10.006 | 70.410 |
| C | -0.930  | -8.989  | 70.516 |
| C | 0.493   | -9.385  | 70.244 |
| O | 1.039   | -9.272  | 69.155 |
| O | 0.851   | -10.306 | 71.200 |
| C | 2.100   | -10.847 | 71.340 |
| C | 3.223   | -10.488 | 70.628 |
| C | 4.464   | -11.089 | 70.949 |
| C | 4.535   | -12.069 | 71.993 |
| C | 3.347   | -12.420 | 72.688 |
| C | 2.157   | -11.822 | 72.370 |
| C | 5.785   | -12.628 | 72.329 |
| C | 6.938   | -12.241 | 71.670 |
| C | 6.870   | -11.276 | 70.627 |
| C | 5.663   | -10.724 | 70.276 |
| C | 8.231   | -12.777 | 72.116 |
| N | 9.330   | -12.032 | 72.086 |
| N | 8.330   | -14.011 | 72.591 |
| N | -5.014  | -8.132  | 71.125 |
| C | -6.095  | -8.608  | 70.436 |
| N | -7.314  | -8.358  | 70.904 |
| N | -5.946  | -9.314  | 69.321 |
| H | -0.585  | -6.927  | 70.956 |
| H | -3.012  | -6.399  | 71.223 |

|   |         |         |        |
|---|---------|---------|--------|
| H | -3.964  | -10.543 | 70.558 |
| H | -1.571  | -11.024 | 70.204 |
| H | 3.165   | -9.748  | 69.845 |
| H | 3.397   | -13.155 | 73.485 |
| H | 1.242   | -12.055 | 72.903 |
| H | 5.835   | -13.329 | 73.157 |
| H | 7.774   | -10.998 | 70.094 |
| H | 5.609   | -9.991  | 69.478 |
| H | 9.239   | -11.034 | 71.958 |
| H | 7.561   | -14.658 | 72.502 |
| H | 9.245   | -14.263 | 73.025 |
| H | -7.422  | -8.008  | 71.845 |
| H | -8.176  | -8.627  | 70.338 |
| H | -5.052  | -9.283  | 68.851 |
| H | -6.812  | -9.604  | 68.765 |
| H | -5.199  | -7.364  | 71.756 |
| H | 10.151  | -12.457 | 72.602 |
| C | -9.796  | -7.087  | 67.059 |
| H | -8.753  | -6.936  | 67.244 |
| H | -10.065 | -6.622  | 66.134 |
| H | -10.365 | -6.653  | 67.855 |
| C | 3.500   | -4.321  | 79.917 |
| H | 3.211   | -3.639  | 80.690 |
| H | 4.044   | -5.136  | 80.345 |
| H | 4.119   | -3.811  | 79.207 |
| C | 11.695  | -10.905 | 76.303 |
| H | 12.275  | -10.665 | 77.170 |
| H | 12.297  | -11.465 | 75.617 |
| H | 11.364  | -10.004 | 75.834 |
| C | 6.600   | -8.655  | 76.397 |
| H | 6.588   | -7.615  | 76.651 |
| H | 7.103   | -9.203  | 77.167 |
| H | 7.118   | -8.790  | 75.470 |
| C | 1.932   | -5.784  | 69.825 |
| H | 1.229   | -5.227  | 70.408 |
| H | 2.781   | -5.170  | 69.607 |
| C | 0.549   | -5.492  | 67.754 |
| C | -0.280  | -6.028  | 66.572 |
| H | -1.098  | -5.365  | 66.380 |
| H | 0.340   | -6.091  | 65.702 |
| H | -0.657  | -7.000  | 66.812 |
| C | 0.239   | -11.206 | 65.233 |
| C | -0.751  | -12.368 | 65.438 |
| H | -1.582  | -12.249 | 64.774 |
| H | -0.260  | -13.296 | 65.232 |
| H | -1.100  | -12.365 | 66.450 |
| H | 1.261   | -9.615  | 65.927 |

Nafamostat (tetrahedral intermediate)

|   |         |         |        |
|---|---------|---------|--------|
| C | 5.191   | -9.277  | 76.276 |
| H | 4.702   | -9.242  | 77.258 |
| H | 5.310   | -10.340 | 76.030 |
| N | 3.572   | -7.499  | 75.581 |
| H | 3.545   | -6.741  | 76.973 |
| C | 4.253   | -8.663  | 75.281 |
| C | 2.746   | -7.262  | 74.575 |
| H | 2.049   | -6.439  | 74.528 |
| N | 2.870   | -8.216  | 73.621 |
| C | 3.827   | -9.115  | 74.054 |
| H | 4.098   | -9.980  | 73.474 |
| C | 10.504  | -11.802 | 76.686 |
| H | 9.720   | -11.212 | 77.180 |
| H | 10.841  | -12.562 | 77.398 |
| C | 9.930   | -12.528 | 75.467 |
| H | 9.649   | -11.808 | 74.687 |
| H | 9.002   | -13.055 | 75.735 |
| C | 10.898  | -13.586 | 74.872 |
| O | 10.681  | -13.926 | 73.638 |
| O | 11.782  | -14.060 | 75.593 |
| C | 2.207   | -4.797  | 79.230 |
| H | 1.529   | -3.959  | 79.047 |
| H | 1.673   | -5.499  | 79.886 |
| C | 2.426   | -5.485  | 77.897 |
| O | 1.696   | -5.305  | 76.930 |
| O | 3.477   | -6.293  | 77.903 |
| C | -10.007 | -8.624  | 67.037 |
| H | -9.769  | -9.032  | 66.051 |
| H | -11.042 | -8.880  | 67.288 |
| C | -9.029  | -9.202  | 68.065 |
| O | -7.934  | -9.648  | 67.612 |
| O | -9.338  | -9.074  | 69.287 |
| O | 0.666   | -11.251 | 64.082 |
| N | 0.555   | -10.300 | 66.163 |
| H | 0.308   | -10.350 | 67.145 |
| O | 0.765   | -4.297  | 67.612 |
| N | 0.991   | -6.188  | 68.822 |
| H | 0.914   | -7.208  | 68.729 |
| C | 2.449   | -7.035  | 70.536 |
| H | 3.139   | -6.736  | 71.331 |
| H | 3.000   | -7.643  | 69.811 |
| O | 1.444   | -7.824  | 71.172 |
| H | 2.304   | -8.270  | 72.766 |
| C | -1.331  | -7.533  | 71.170 |
| C | -2.714  | -7.423  | 71.316 |
| C | -3.554  | -8.449  | 70.874 |
| C | -3.000  | -9.574  | 70.246 |
| C | -1.623  | -9.650  | 70.072 |
| C | -0.770  | -8.649  | 70.551 |

|   |         |         |        |
|---|---------|---------|--------|
| C | 0.735   | -8.858  | 70.357 |
| O | 1.145   | -9.008  | 69.160 |
| O | 0.902   | -10.111 | 71.266 |
| C | 2.067   | -10.746 | 71.393 |
| C | 3.224   | -10.503 | 70.659 |
| C | 4.419   | -11.184 | 70.974 |
| C | 4.439   | -12.154 | 72.032 |
| C | 3.226   | -12.428 | 72.723 |
| C | 2.081   | -11.747 | 72.416 |
| C | 5.656   | -12.763 | 72.390 |
| C | 6.837   | -12.450 | 71.732 |
| C | 6.813   | -11.520 | 70.655 |
| C | 5.638   | -10.915 | 70.286 |
| C | 8.103   | -13.006 | 72.212 |
| N | 9.243   | -12.332 | 72.078 |
| N | 8.158   | -14.185 | 72.821 |
| N | -4.945  | -8.356  | 71.151 |
| C | -5.986  | -8.758  | 70.366 |
| N | -7.215  | -8.747  | 70.879 |
| N | -5.798  | -9.156  | 69.114 |
| H | -0.681  | -6.754  | 71.548 |
| H | -3.143  | -6.545  | 71.793 |
| H | -3.636  | -10.394 | 69.932 |
| H | -1.190  | -10.526 | 69.602 |
| H | 3.196   | -9.797  | 69.842 |
| H | 3.229   | -13.168 | 73.520 |
| H | 1.155   | -11.923 | 72.954 |
| H | 5.665   | -13.440 | 73.240 |
| H | 7.727   | -11.310 | 70.108 |
| H | 5.624   | -10.208 | 69.463 |
| H | 9.203   | -11.347 | 71.859 |
| H | 7.365   | -14.807 | 72.808 |
| H | 9.072   | -14.431 | 73.261 |
| H | -7.334  | -8.656  | 71.877 |
| H | -8.064  | -8.951  | 70.266 |
| H | -4.919  | -8.938  | 68.665 |
| H | -6.640  | -9.437  | 68.525 |
| H | -5.197  | -7.807  | 71.962 |
| H | 10.056  | -12.747 | 72.602 |
| C | -9.796  | -7.087  | 67.059 |
| H | -8.753  | -6.936  | 67.244 |
| H | -10.065 | -6.622  | 66.134 |
| H | -10.365 | -6.653  | 67.855 |
| C | 3.500   | -4.321  | 79.917 |
| H | 3.211   | -3.639  | 80.690 |
| H | 4.044   | -5.136  | 80.345 |
| H | 4.119   | -3.811  | 79.207 |
| C | 11.695  | -10.905 | 76.303 |
| H | 12.275  | -10.665 | 77.170 |

|   |        |         |        |
|---|--------|---------|--------|
| H | 12.297 | -11.465 | 75.617 |
| H | 11.364 | -10.004 | 75.834 |
| C | 6.600  | -8.655  | 76.397 |
| H | 6.588  | -7.615  | 76.651 |
| H | 7.103  | -9.203  | 77.167 |
| H | 7.118  | -8.790  | 75.470 |
| C | 1.932  | -5.784  | 69.825 |
| H | 1.229  | -5.227  | 70.408 |
| H | 2.781  | -5.170  | 69.607 |
| C | 0.549  | -5.492  | 67.754 |
| C | -0.280 | -6.028  | 66.572 |
| H | -1.098 | -5.365  | 66.380 |
| H | 0.340  | -6.091  | 65.702 |
| H | -0.657 | -7.000  | 66.812 |
| C | 0.239  | -11.206 | 65.233 |
| C | -0.751 | -12.368 | 65.438 |
| H | -1.582 | -12.249 | 64.774 |
| H | -0.260 | -13.296 | 65.232 |
| H | -1.100 | -12.365 | 66.450 |
| H | 1.264  | -9.620  | 65.922 |

Nafamostat (TS2)

|   |        |         |        |
|---|--------|---------|--------|
| C | 5.190  | -9.278  | 76.287 |
| H | 4.709  | -9.235  | 77.273 |
| H | 5.308  | -10.342 | 76.049 |
| N | 3.574  | -7.500  | 75.571 |
| H | 3.558  | -6.720  | 76.956 |
| C | 4.244  | -8.677  | 75.293 |
| C | 2.731  | -7.289  | 74.574 |
| H | 2.034  | -6.466  | 74.517 |
| N | 2.835  | -8.271  | 73.647 |
| C | 3.794  | -9.163  | 74.088 |
| H | 4.051  | -10.047 | 73.531 |
| C | 10.504 | -11.803 | 76.686 |
| H | 9.713  | -11.209 | 77.166 |
| H | 10.838 | -12.552 | 77.410 |
| C | 9.944  | -12.547 | 75.472 |
| H | 9.676  | -11.839 | 74.676 |
| H | 9.010  | -13.066 | 75.735 |
| C | 10.915 | -13.618 | 74.905 |
| O | 10.684 | -14.011 | 73.691 |
| O | 11.817 | -14.050 | 75.631 |
| C | 2.209  | -4.799  | 79.228 |
| H | 1.528  | -3.962  | 79.047 |
| H | 1.675  | -5.504  | 79.880 |
| C | 2.427  | -5.482  | 77.892 |
| O | 1.682  | -5.318  | 76.934 |
| O | 3.494  | -6.269  | 77.885 |

|   |         |         |        |
|---|---------|---------|--------|
| C | -10.002 | -8.625  | 67.035 |
| H | -9.772  | -9.026  | 66.043 |
| H | -11.033 | -8.888  | 67.295 |
| C | -9.011  | -9.210  | 68.046 |
| O | -7.896  | -9.591  | 67.578 |
| O | -9.330  | -9.158  | 69.270 |
| O | 0.666   | -11.251 | 64.082 |
| N | 0.554   | -10.300 | 66.164 |
| H | 0.312   | -10.369 | 67.144 |
| O | 0.765   | -4.297  | 67.612 |
| N | 0.991   | -6.188  | 68.822 |
| H | 0.915   | -7.202  | 68.719 |
| C | 2.423   | -7.032  | 70.559 |
| H | 3.090   | -6.737  | 71.374 |
| H | 2.978   | -7.671  | 69.866 |
| O | 1.366   | -7.780  | 71.174 |
| H | 2.247   | -8.359  | 72.814 |
| C | -1.404  | -7.717  | 71.406 |
| C | -2.788  | -7.703  | 71.584 |
| C | -3.582  | -8.698  | 71.008 |
| C | -2.983  | -9.696  | 70.226 |
| C | -1.608  | -9.676  | 70.027 |
| C | -0.802  | -8.702  | 70.625 |
| C | 0.693   | -8.783  | 70.388 |
| O | 1.120   | -9.033  | 69.238 |
| O | 0.893   | -10.164 | 71.494 |
| C | 2.020   | -10.826 | 71.589 |
| C | 3.176   | -10.599 | 70.829 |
| C | 4.370   | -11.290 | 71.109 |
| C | 4.411   | -12.265 | 72.165 |
| C | 3.209   | -12.537 | 72.880 |
| C | 2.062   | -11.851 | 72.602 |
| C | 5.631   | -12.877 | 72.496 |
| C | 6.803   | -12.569 | 71.818 |
| C | 6.758   | -11.637 | 70.741 |
| C | 5.578   | -11.028 | 70.397 |
| C | 8.075   | -13.121 | 72.276 |
| N | 9.219   | -12.461 | 72.089 |
| N | 8.143   | -14.283 | 72.916 |
| N | -4.974  | -8.710  | 71.295 |
| C | -6.000  | -8.999  | 70.441 |
| N | -7.233  | -9.097  | 70.934 |
| N | -5.793  | -9.183  | 69.144 |
| H | -0.788  | -6.959  | 71.875 |
| H | -3.251  | -6.923  | 72.183 |
| H | -3.584  | -10.496 | 69.807 |
| H | -1.135  | -10.454 | 69.437 |
| H | 3.146   | -9.883  | 70.020 |
| H | 3.226   | -13.284 | 73.670 |

|   |         |         |        |
|---|---------|---------|--------|
| H | 1.147   | -12.030 | 73.158 |
| H | 5.652   | -13.554 | 73.346 |
| H | 7.660   | -11.430 | 70.174 |
| H | 5.551   | -10.321 | 69.573 |
| H | 9.179   | -11.479 | 71.859 |
| H | 7.346   | -14.899 | 72.949 |
| H | 9.064   | -14.516 | 73.348 |
| H | -7.364  | -9.160  | 71.933 |
| H | -8.074  | -9.193  | 70.284 |
| H | -4.911  | -8.893  | 68.746 |
| H | -6.622  | -9.413  | 68.512 |
| H | -5.246  | -8.289  | 72.173 |
| H | 10.039  | -12.863 | 72.609 |
| C | -9.796  | -7.087  | 67.059 |
| H | -8.753  | -6.936  | 67.244 |
| H | -10.065 | -6.622  | 66.134 |
| H | -10.365 | -6.653  | 67.855 |
| C | 3.500   | -4.321  | 79.917 |
| H | 3.211   | -3.639  | 80.690 |
| H | 4.044   | -5.136  | 80.345 |
| H | 4.119   | -3.811  | 79.207 |
| C | 11.695  | -10.905 | 76.304 |
| H | 12.275  | -10.665 | 77.170 |
| H | 12.297  | -11.465 | 75.617 |
| H | 11.364  | -10.004 | 75.834 |
| C | 6.600   | -8.655  | 76.397 |
| H | 6.588   | -7.615  | 76.652 |
| H | 7.103   | -9.203  | 77.167 |
| H | 7.118   | -8.790  | 75.470 |
| C | 1.932   | -5.784  | 69.824 |
| H | 1.229   | -5.227  | 70.408 |
| H | 2.781   | -5.170  | 69.607 |
| C | 0.549   | -5.492  | 67.754 |
| C | -0.280  | -6.028  | 66.572 |
| H | -1.098  | -5.365  | 66.380 |
| H | 0.340   | -6.091  | 65.702 |
| H | -0.657  | -7.000  | 66.812 |
| C | 0.240   | -11.206 | 65.233 |
| C | -0.751  | -12.368 | 65.438 |
| H | -1.582  | -12.249 | 64.774 |
| H | -0.260  | -13.296 | 65.232 |
| H | -1.100  | -12.365 | 66.450 |
| H | 1.273   | -9.628  | 65.930 |

Nafamostat (acyl intermediate)

|   |       |         |        |
|---|-------|---------|--------|
| C | 5.190 | -9.281  | 76.356 |
| H | 4.747 | -9.179  | 77.356 |
| H | 5.306 | -10.359 | 76.186 |



|   |         |         |        |
|---|---------|---------|--------|
| N | 3.512   | -7.580  | 75.533 |
| H | 3.544   | -6.674  | 76.882 |
| C | 4.189   | -8.776  | 75.365 |
| C | 2.588   | -7.530  | 74.585 |
| H | 1.858   | -6.741  | 74.473 |
| N | 2.650   | -8.628  | 73.790 |
| C | 3.660   | -9.432  | 74.280 |
| H | 3.896   | -10.385 | 73.840 |
| C | 10.498  | -11.796 | 76.690 |
| H | 9.695   | -11.186 | 77.128 |
| H | 10.816  | -12.516 | 77.449 |
| C | 9.967   | -12.591 | 75.495 |
| H | 9.762   | -11.925 | 74.646 |
| H | 9.002   | -13.061 | 75.740 |
| C | 10.921  | -13.726 | 75.034 |
| O | 10.656  | -14.253 | 73.881 |
| O | 11.840  | -14.077 | 75.783 |
| C | 2.215   | -4.806  | 79.221 |
| H | 1.527   | -3.974  | 79.047 |
| H | 1.681   | -5.514  | 79.871 |
| C | 2.405   | -5.490  | 77.877 |
| O | 1.584   | -5.397  | 76.974 |
| O | 3.524   | -6.199  | 77.798 |
| C | -9.986  | -8.627  | 67.041 |
| H | -9.772  | -9.019  | 66.042 |
| H | -11.005 | -8.908  | 67.322 |
| C | -8.965  | -9.225  | 68.019 |
| O | -7.799  | -9.399  | 67.549 |
| O | -9.321  | -9.408  | 69.219 |
| O | 0.666   | -11.251 | 64.082 |
| N | 0.555   | -10.300 | 66.163 |
| H | 0.328   | -10.400 | 67.144 |
| O | 0.765   | -4.297  | 67.612 |
| N | 0.991   | -6.188  | 68.822 |
| H | 0.963   | -7.192  | 68.667 |
| C | 2.310   | -7.026  | 70.634 |
| H | 2.887   | -6.756  | 71.519 |
| H | 2.869   | -7.754  | 70.041 |
| O | 1.099   | -7.644  | 71.137 |
| H | 1.960   | -8.936  | 73.092 |
| C | -1.575  | -8.078  | 71.723 |
| C | -2.937  | -8.260  | 71.946 |
| C | -3.647  | -9.226  | 71.224 |
| C | -2.975  | -10.030 | 70.292 |
| C | -1.621  | -9.825  | 70.061 |
| C | -0.910  | -8.847  | 70.764 |
| C | 0.506   | -8.604  | 70.387 |
| O | 1.013   | -9.068  | 69.369 |
| O | 0.947   | -10.326 | 72.168 |

|   |         |         |        |
|---|---------|---------|--------|
| C | 1.920   | -11.156 | 72.131 |
| C | 3.025   | -11.037 | 71.246 |
| C | 4.196   | -11.778 | 71.426 |
| C | 4.281   | -12.748 | 72.493 |
| C | 3.114   | -12.981 | 73.283 |
| C | 1.983   | -12.241 | 73.100 |
| C | 5.507   | -13.363 | 72.774 |
| C | 6.658   | -13.076 | 72.040 |
| C | 6.557   | -12.178 | 70.934 |
| C | 5.370   | -11.567 | 70.634 |
| C | 7.950   | -13.574 | 72.476 |
| N | 9.081   | -12.931 | 72.160 |
| N | 8.078   | -14.668 | 73.226 |
| N | -5.032  | -9.403  | 71.481 |
| C | -6.028  | -9.481  | 70.540 |
| N | -7.278  | -9.684  | 70.950 |
| N | -5.772  | -9.364  | 69.246 |
| H | -1.032  | -7.321  | 72.275 |
| H | -3.457  | -7.639  | 72.671 |
| H | -3.509  | -10.814 | 69.766 |
| H | -1.092  | -10.439 | 69.341 |
| H | 2.980   | -10.282 | 70.468 |
| H | 3.160   | -13.738 | 74.065 |
| H | 1.109   | -12.380 | 73.731 |
| H | 5.561   | -14.017 | 73.641 |
| H | 7.429   | -11.998 | 70.311 |
| H | 5.308   | -10.882 | 69.793 |
| H | 9.013   | -11.969 | 71.865 |
| H | 7.294   | -15.283 | 73.376 |
| H | 9.015   | -14.834 | 73.644 |
| H | -7.449  | -9.966  | 71.903 |
| H | -8.090  | -9.632  | 70.260 |
| H | -4.872  | -9.006  | 68.956 |
| H | -6.582  | -9.428  | 68.546 |
| H | -5.341  | -9.155  | 72.411 |
| H | 9.924   | -13.259 | 72.692 |
| C | -9.796  | -7.087  | 67.059 |
| H | -8.753  | -6.936  | 67.244 |
| H | -10.065 | -6.622  | 66.134 |
| H | -10.365 | -6.653  | 67.855 |
| C | 3.500   | -4.321  | 79.917 |
| H | 3.211   | -3.639  | 80.690 |
| H | 4.044   | -5.136  | 80.345 |
| H | 4.119   | -3.811  | 79.207 |
| C | 11.695  | -10.905 | 76.303 |
| H | 12.275  | -10.665 | 77.170 |
| H | 12.297  | -11.465 | 75.617 |
| H | 11.364  | -10.004 | 75.834 |
| C | 6.600   | -8.655  | 76.397 |

|   |        |         |        |
|---|--------|---------|--------|
| H | 6.588  | -7.615  | 76.651 |
| H | 7.103  | -9.203  | 77.167 |
| H | 7.118  | -8.790  | 75.470 |
| C | 1.932  | -5.784  | 69.825 |
| H | 1.229  | -5.227  | 70.408 |
| H | 2.781  | -5.170  | 69.607 |
| C | 0.549  | -5.492  | 67.754 |
| C | -0.280 | -6.028  | 66.572 |
| H | -1.098 | -5.365  | 66.380 |
| H | 0.340  | -6.091  | 65.702 |
| H | -0.657 | -7.000  | 66.812 |
| C | 0.239  | -11.206 | 65.233 |
| C | -0.751 | -12.368 | 65.438 |
| H | -1.582 | -12.249 | 64.774 |
| H | -0.260 | -13.296 | 65.232 |
| H | -1.100 | -12.365 | 66.450 |
| H | 1.293  | -9.646  | 65.936 |

Camostat (reactant)

|   |         |         |        |
|---|---------|---------|--------|
| C | 4.852   | -9.159  | 77.104 |
| H | 4.426   | -9.020  | 78.104 |
| H | 4.953   | -10.238 | 76.952 |
| N | 2.726   | -7.927  | 76.536 |
| H | 2.524   | -7.553  | 77.518 |
| C | 3.867   | -8.585  | 76.116 |
| C | 2.002   | -7.612  | 75.442 |
| H | 1.064   | -7.076  | 75.495 |
| N | 2.588   | -8.027  | 74.320 |
| C | 3.767   | -8.624  | 74.738 |
| H | 4.461   | -9.043  | 74.029 |
| C | 9.986   | -12.041 | 76.869 |
| H | 10.228  | -13.003 | 77.343 |
| H | 9.445   | -12.274 | 75.948 |
| C | 8.999   | -11.251 | 77.741 |
| H | 9.076   | -10.185 | 77.482 |
| H | 9.219   | -11.343 | 78.810 |
| C | 7.527   | -11.674 | 77.461 |
| O | 7.187   | -11.616 | 76.231 |
| O | 6.814   | -12.025 | 78.423 |
| C | 2.520   | -4.956  | 80.278 |
| H | 1.587   | -4.430  | 80.027 |
| H | 2.264   | -5.620  | 81.114 |
| C | 2.892   | -5.844  | 79.068 |
| O | 2.103   | -6.835  | 78.883 |
| O | 3.882   | -5.526  | 78.380 |
| C | -9.483  | -8.870  | 68.157 |
| H | -9.463  | -9.574  | 67.313 |
| H | -10.420 | -9.044  | 68.694 |

|   |        |         |        |
|---|--------|---------|--------|
| C | -8.301 | -9.258  | 69.066 |
| O | -8.537 | -9.989  | 70.069 |
| O | -7.163 | -8.830  | 68.706 |
| O | 0.192  | -11.333 | 64.942 |
| N | 1.183  | -10.627 | 66.834 |
| H | 1.404  | -10.703 | 67.825 |
| O | 1.421  | -4.610  | 67.985 |
| N | 1.798  | -6.557  | 68.975 |
| H | 1.560  | -7.545  | 69.016 |
| C | 2.542  | -6.963  | 71.296 |
| H | 2.960  | -6.391  | 72.134 |
| H | 3.377  | -7.540  | 70.860 |
| O | 1.521  | -7.821  | 71.763 |
| H | 1.797  | -8.013  | 72.708 |
| C | 5.408  | -16.637 | 74.898 |
| N | 6.381  | -15.565 | 74.769 |
| C | 6.293  | -14.523 | 75.789 |
| C | 7.320  | -15.648 | 73.790 |
| O | 7.402  | -16.601 | 73.008 |
| C | 8.346  | -14.520 | 73.680 |
| O | 7.667  | -13.280 | 73.429 |
| C | 8.466  | -12.198 | 73.304 |
| O | 9.678  | -12.277 | 73.244 |
| C | 7.697  | -10.897 | 73.347 |
| C | 6.263  | -10.933 | 72.880 |
| C | 5.875  | -10.369 | 71.661 |
| C | 4.536  | -10.334 | 71.255 |
| C | 3.581  | -10.895 | 72.098 |
| C | 3.947  | -11.492 | 73.307 |
| C | 5.278  | -11.497 | 73.704 |
| O | 2.198  | -10.843 | 71.906 |
| C | 1.533  | -10.459 | 70.807 |
| O | 2.031  | -10.266 | 69.705 |
| C | 0.073  | -10.420 | 71.089 |
| C | -0.420 | -10.434 | 72.401 |
| C | -1.788 | -10.464 | 72.633 |
| C | -2.689 | -10.505 | 71.560 |
| C | -2.203 | -10.473 | 70.245 |
| C | -0.831 | -10.410 | 70.023 |
| N | -4.063 | -10.650 | 71.861 |
| C | -5.146 | -10.229 | 71.136 |
| N | -6.344 | -10.723 | 71.448 |
| N | -5.028 | -9.342  | 70.163 |
| H | 5.535  | -17.331 | 74.068 |
| H | 5.548  | -17.171 | 75.847 |
| H | 4.393  | -16.221 | 74.886 |
| H | 6.519  | -14.940 | 76.779 |
| H | 6.944  | -13.673 | 75.604 |
| H | 5.269  | -14.134 | 75.815 |

|   |        |         |        |
|---|--------|---------|--------|
| H | 8.944  | -14.424 | 74.592 |
| H | 9.009  | -14.763 | 72.849 |
| H | 7.710  | -10.663 | 74.425 |
| H | 8.287  | -10.150 | 72.811 |
| H | 6.627  | -9.921  | 71.015 |
| H | 4.246  | -9.873  | 70.322 |
| H | 3.168  | -11.878 | 73.956 |
| H | 5.568  | -11.860 | 74.686 |
| H | 0.273  | -10.400 | 73.233 |
| H | -2.164 | -10.458 | 73.652 |
| H | -2.883 | -10.531 | 69.404 |
| H | -0.458 | -10.370 | 69.007 |
| H | -6.388 | -11.590 | 71.966 |
| H | -7.211 | -10.412 | 70.910 |
| H | -4.179 | -8.799  | 70.092 |
| H | -5.887 | -9.106  | 69.567 |
| H | -4.275 | -11.025 | 72.776 |
| C | -9.348 | -7.428  | 67.632 |
| H | -8.298 | -7.281  | 67.499 |
| H | -9.851 | -7.276  | 66.699 |
| H | -9.718 | -6.731  | 68.354 |
| C | 6.269  | -8.546  | 77.080 |
| H | 6.831  | -8.930  | 77.908 |
| H | 6.760  | -8.817  | 76.166 |
| H | 6.208  | -7.482  | 77.150 |
| C | 3.600  | -3.950  | 80.697 |
| H | 3.251  | -3.416  | 81.557 |
| H | 4.499  | -4.476  | 80.948 |
| H | 3.798  | -3.262  | 79.905 |
| C | 11.276 | -11.308 | 76.443 |
| H | 12.077 | -11.351 | 77.154 |
| H | 11.587 | -11.777 | 75.532 |
| H | 11.025 | -10.287 | 76.253 |
| C | 0.330  | -11.411 | 66.159 |
| C | 1.259  | -5.835  | 67.981 |
| C | 2.075  | -5.961  | 70.249 |
| H | 1.213  | -5.396  | 70.535 |
| H | 2.909  | -5.302  | 70.125 |
| C | -0.600 | -12.485 | 66.752 |
| H | -1.619 | -12.227 | 66.548 |
| H | -0.377 | -13.434 | 66.310 |
| H | -0.452 | -12.541 | 67.810 |
| C | 0.458  | -6.347  | 66.770 |
| H | -0.588 | -6.204  | 66.947 |
| H | 0.748  | -5.805  | 65.895 |
| H | 0.656  | -7.389  | 66.626 |
| H | 1.756  | -10.012 | 66.272 |

Camostat (TS1)

|   |         |         |        |
|---|---------|---------|--------|
| C | 4.843   | -9.126  | 77.087 |
| H | 4.389   | -8.958  | 78.069 |
| H | 4.923   | -10.209 | 76.941 |
| N | 2.803   | -7.786  | 76.415 |
| H | 2.569   | -7.359  | 77.412 |
| C | 3.907   | -8.543  | 76.057 |
| C | 2.112   | -7.487  | 75.311 |
| H | 1.207   | -6.899  | 75.291 |
| N | 2.713   | -8.010  | 74.236 |
| C | 3.848   | -8.662  | 74.686 |
| H | 4.518   | -9.158  | 74.008 |
| C | 9.996   | -12.070 | 76.860 |
| H | 10.251  | -13.000 | 77.387 |
| H | 9.507   | -12.375 | 75.928 |
| C | 8.945   | -11.295 | 77.672 |
| H | 8.868   | -10.273 | 77.279 |
| H | 9.227   | -11.240 | 78.731 |
| C | 7.580   | -12.016 | 77.501 |
| O | 6.919   | -11.692 | 76.458 |
| O | 7.289   | -12.907 | 78.331 |
| C | 2.551   | -4.972  | 80.242 |
| H | 1.614   | -4.477  | 79.950 |
| H | 2.278   | -5.644  | 81.068 |
| C | 3.007   | -5.856  | 79.060 |
| O | 2.103   | -6.663  | 78.629 |
| O | 4.168   | -5.741  | 78.628 |
| C | -9.488  | -8.868  | 68.155 |
| H | -9.459  | -9.574  | 67.313 |
| H | -10.430 | -9.044  | 68.684 |
| C | -8.312  | -9.244  | 69.074 |
| O | -8.544  | -9.987  | 70.068 |
| O | -7.181  | -8.788  | 68.727 |
| O | 0.192   | -11.333 | 64.942 |
| N | 1.183   | -10.627 | 66.834 |
| H | 1.352   | -10.638 | 67.836 |
| O | 1.421   | -4.610  | 67.985 |
| N | 1.798   | -6.557  | 68.975 |
| H | 1.628   | -7.562  | 69.004 |
| C | 2.609   | -6.983  | 71.276 |
| H | 3.112   | -6.374  | 72.055 |
| H | 3.431   | -7.499  | 70.742 |
| O | 1.729   | -7.877  | 71.866 |
| H | 2.269   | -7.999  | 73.179 |
| C | 5.397   | -16.793 | 74.976 |
| N | 6.339   | -15.699 | 74.804 |
| C | 6.475   | -14.790 | 75.943 |
| C | 7.152   | -15.707 | 73.715 |
| O | 7.123   | -16.588 | 72.849 |
| C | 8.172   | -14.576 | 73.584 |

|   |        |         |        |
|---|--------|---------|--------|
| O | 7.476  | -13.323 | 73.492 |
| C | 8.260  | -12.224 | 73.420 |
| O | 9.470  | -12.286 | 73.311 |
| C | 7.470  | -10.949 | 73.593 |
| C | 6.088  | -10.925 | 72.988 |
| C | 5.798  | -10.159 | 71.855 |
| C | 4.496  | -10.038 | 71.356 |
| C | 3.469  | -10.706 | 72.017 |
| C | 3.745  | -11.526 | 73.117 |
| C | 5.041  | -11.625 | 73.605 |
| O | 2.120  | -10.586 | 71.745 |
| C | 1.531  | -9.816  | 70.776 |
| O | 2.032  | -9.587  | 69.673 |
| C | 0.060  | -9.838  | 71.044 |
| C | -0.428 | -9.982  | 72.350 |
| C | -1.784 | -10.160 | 72.579 |
| C | -2.677 | -10.232 | 71.501 |
| C | -2.202 | -10.069 | 70.194 |
| C | -0.841 | -9.853  | 69.979 |
| N | -4.028 | -10.558 | 71.784 |
| C | -5.147 | -10.117 | 71.138 |
| N | -6.311 | -10.715 | 71.406 |
| N | -5.101 | -9.107  | 70.288 |
| H | 5.363  | -17.375 | 74.056 |
| H | 5.703  | -17.444 | 75.806 |
| H | 4.403  | -16.392 | 75.203 |
| H | 7.094  | -15.227 | 76.735 |
| H | 6.877  | -13.820 | 75.664 |
| H | 5.484  | -14.596 | 76.366 |
| H | 8.860  | -14.546 | 74.435 |
| H | 8.746  | -14.756 | 72.674 |
| H | 7.375  | -10.866 | 74.695 |
| H | 8.090  | -10.130 | 73.220 |
| H | 6.599  | -9.612  | 71.362 |
| H | 4.279  | -9.424  | 70.494 |
| H | 2.918  | -12.017 | 73.620 |
| H | 5.254  | -12.181 | 74.512 |
| H | 0.267  | -9.958  | 73.179 |
| H | -2.157 | -10.265 | 73.594 |
| H | -2.876 | -10.156 | 69.349 |
| H | -0.469 | -9.742  | 68.966 |
| H | -6.289 | -11.648 | 71.793 |
| H | -7.192 | -10.410 | 70.895 |
| H | -4.258 | -8.555  | 70.222 |
| H | -5.946 | -8.926  | 69.655 |
| H | -4.190 | -11.066 | 72.643 |
| C | -9.348 | -7.428  | 67.632 |
| H | -8.298 | -7.281  | 67.499 |
| H | -9.851 | -7.276  | 66.699 |

|   |        |         |        |
|---|--------|---------|--------|
| H | -9.718 | -6.731  | 68.354 |
| C | 6.269  | -8.546  | 77.080 |
| H | 6.831  | -8.930  | 77.908 |
| H | 6.760  | -8.817  | 76.166 |
| H | 6.208  | -7.482  | 77.150 |
| C | 3.600  | -3.950  | 80.697 |
| H | 3.251  | -3.416  | 81.557 |
| H | 4.499  | -4.476  | 80.948 |
| H | 3.798  | -3.262  | 79.905 |
| C | 11.276 | -11.308 | 76.443 |
| H | 12.077 | -11.351 | 77.154 |
| H | 11.587 | -11.777 | 75.532 |
| H | 11.025 | -10.287 | 76.253 |
| C | 0.330  | -11.411 | 66.159 |
| C | 1.259  | -5.835  | 67.981 |
| C | 2.075  | -5.961  | 70.249 |
| H | 1.213  | -5.396  | 70.535 |
| H | 2.909  | -5.302  | 70.125 |
| C | -0.600 | -12.485 | 66.752 |
| H | -1.619 | -12.227 | 66.548 |
| H | -0.377 | -13.434 | 66.310 |
| H | -0.452 | -12.541 | 67.810 |
| C | 0.458  | -6.347  | 66.770 |
| H | -0.588 | -6.204  | 66.947 |
| H | 0.748  | -5.805  | 65.895 |
| H | 0.656  | -7.389  | 66.626 |
| H | 1.733  | -9.984  | 66.281 |

Camostat (tetrahedral intermediate)

|   |        |         |        |
|---|--------|---------|--------|
| C | 4.859  | -9.170  | 77.172 |
| H | 4.393  | -8.857  | 78.114 |
| H | 4.968  | -10.261 | 77.224 |
| N | 2.915  | -7.886  | 76.175 |
| H | 2.564  | -7.021  | 77.615 |
| C | 3.917  | -8.837  | 76.054 |
| C | 2.260  | -7.887  | 75.021 |
| H | 1.410  | -7.269  | 74.771 |
| N | 2.792  | -8.787  | 74.160 |
| C | 3.845  | -9.402  | 74.802 |
| H | 4.432  | -10.167 | 74.320 |
| C | 10.028 | -12.016 | 77.000 |
| H | 9.728  | -11.523 | 77.937 |
| H | 10.261 | -13.059 | 77.247 |
| C | 8.856  | -12.026 | 76.007 |
| H | 8.658  | -11.011 | 75.637 |
| H | 7.954  | -12.377 | 76.526 |
| C | 9.131  | -12.990 | 74.817 |
| O | 9.254  | -12.463 | 73.672 |



|   |         |         |        |
|---|---------|---------|--------|
| O | 9.232   | -14.207 | 75.123 |
| C | 2.574   | -4.968  | 80.181 |
| H | 1.603   | -4.495  | 79.981 |
| H | 2.373   | -5.761  | 80.912 |
| C | 3.039   | -5.619  | 78.880 |
| O | 2.250   | -6.625  | 78.503 |
| O | 4.018   | -5.241  | 78.259 |
| C | -9.492  | -8.866  | 68.154 |
| H | -9.431  | -9.580  | 67.320 |
| H | -10.460 | -9.052  | 68.635 |
| C | -8.371  | -9.268  | 69.135 |
| O | -8.575  | -10.291 | 69.850 |
| O | -7.317  | -8.568  | 69.114 |
| O | 0.192   | -11.333 | 64.942 |
| N | 1.183   | -10.627 | 66.834 |
| H | 1.269   | -10.531 | 67.848 |
| O | 1.421   | -4.610  | 67.985 |
| N | 1.797   | -6.556  | 68.975 |
| H | 1.639   | -7.575  | 69.000 |
| C | 2.382   | -7.075  | 71.249 |
| H | 2.606   | -6.636  | 72.228 |
| H | 3.262   | -7.639  | 70.926 |
| O | 1.258   | -7.944  | 71.428 |
| H | 2.437   | -9.041  | 73.231 |
| C | 10.860  | -16.392 | 70.731 |
| N | 9.490   | -16.045 | 71.067 |
| C | 9.299   | -15.479 | 72.409 |
| C | 8.519   | -16.279 | 70.150 |
| O | 8.703   | -16.910 | 69.104 |
| C | 7.101   | -15.772 | 70.443 |
| O | 7.009   | -14.480 | 71.059 |
| C | 7.528   | -13.451 | 70.341 |
| O | 8.009   | -13.604 | 69.238 |
| C | 7.419   | -12.146 | 71.096 |
| C | 5.989   | -11.646 | 71.180 |
| C | 5.533   | -10.638 | 70.325 |
| C | 4.244   | -10.110 | 70.417 |
| C | 3.362   | -10.609 | 71.386 |
| C | 3.788   | -11.669 | 72.205 |
| C | 5.085   | -12.167 | 72.114 |
| O | 2.138   | -10.091 | 71.701 |
| C | 1.273   | -9.235  | 70.735 |
| O | 1.669   | -9.255  | 69.516 |
| C | -0.142  | -9.775  | 70.993 |
| C | -0.643  | -10.031 | 72.273 |
| C | -1.949  | -10.482 | 72.449 |
| C | -2.767  | -10.703 | 71.336 |
| C | -2.270  | -10.469 | 70.050 |
| C | -0.971  | -9.990  | 69.891 |

|   |        |         |        |
|---|--------|---------|--------|
| N | -4.096 | -11.194 | 71.514 |
| C | -5.222 | -10.598 | 71.024 |
| N | -6.405 | -11.197 | 71.211 |
| N | -5.163 | -9.438  | 70.394 |
| H | 10.903 | -16.684 | 69.683 |
| H | 11.512 | -15.529 | 70.908 |
| H | 11.215 | -17.225 | 71.354 |
| H | 9.959  | -16.004 | 73.103 |
| H | 9.525  | -14.409 | 72.470 |
| H | 8.278  | -15.615 | 72.758 |
| H | 6.580  | -15.770 | 69.485 |
| H | 6.591  | -16.445 | 71.138 |
| H | 7.857  | -12.287 | 72.096 |
| H | 8.037  | -11.424 | 70.557 |
| H | 6.212  | -10.230 | 69.580 |
| H | 3.915  | -9.330  | 69.746 |
| H | 3.091  | -12.061 | 72.940 |
| H | 5.404  | -12.964 | 72.780 |
| H | -0.007 | -9.873  | 73.137 |
| H | -2.340 | -10.660 | 73.447 |
| H | -2.894 | -10.666 | 69.184 |
| H | -0.577 | -9.785  | 68.903 |
| H | -6.400 | -12.187 | 71.412 |
| H | -7.262 | -10.809 | 70.719 |
| H | -4.283 | -8.944  | 70.359 |
| H | -6.029 | -9.057  | 69.903 |
| H | -4.239 | -11.878 | 72.245 |
| C | -9.347 | -7.428  | 67.632 |
| H | -8.298 | -7.281  | 67.499 |
| H | -9.852 | -7.276  | 66.699 |
| H | -9.719 | -6.731  | 68.354 |
| C | 6.269  | -8.545  | 77.079 |
| H | 6.831  | -8.930  | 77.908 |
| H | 6.760  | -8.817  | 76.167 |
| H | 6.208  | -7.482  | 77.150 |
| C | 3.600  | -3.950  | 80.697 |
| H | 3.251  | -3.416  | 81.557 |
| H | 4.499  | -4.476  | 80.948 |
| H | 3.798  | -3.262  | 79.905 |
| C | 11.276 | -11.308 | 76.443 |
| H | 12.077 | -11.352 | 77.154 |
| H | 11.588 | -11.777 | 75.533 |
| H | 11.025 | -10.287 | 76.254 |
| C | 0.330  | -11.411 | 66.159 |
| C | 1.259  | -5.835  | 67.981 |
| C | 2.076  | -5.961  | 70.249 |
| H | 1.213  | -5.396  | 70.535 |
| H | 2.909  | -5.302  | 70.125 |
| C | -0.600 | -12.485 | 66.752 |

|   |        |         |        |
|---|--------|---------|--------|
| H | -1.619 | -12.227 | 66.548 |
| H | -0.377 | -13.434 | 66.310 |
| H | -0.452 | -12.541 | 67.810 |
| C | 0.458  | -6.347  | 66.770 |
| H | -0.588 | -6.204  | 66.947 |
| H | 0.748  | -5.805  | 65.895 |
| H | 0.656  | -7.389  | 66.626 |
| H | 1.686  | -9.951  | 66.275 |

Camostat (TS2)

|   |         |         |        |
|---|---------|---------|--------|
| C | 4.864   | -9.174  | 77.199 |
| H | 4.413   | -8.850  | 78.144 |
| H | 4.980   | -10.263 | 77.267 |
| N | 2.921   | -7.898  | 76.186 |
| H | 2.578   | -7.018  | 77.603 |
| C | 3.907   | -8.869  | 76.091 |
| C | 2.250   | -7.941  | 75.039 |
| H | 1.404   | -7.321  | 74.778 |
| N | 2.755   | -8.885  | 74.212 |
| C | 3.806   | -9.486  | 74.867 |
| H | 4.373   | -10.283 | 74.413 |
| C | 10.027  | -12.023 | 76.993 |
| H | 9.673   | -11.486 | 77.886 |
| H | 10.280  | -13.042 | 77.308 |
| C | 8.902   | -12.139 | 75.955 |
| H | 8.680   | -11.163 | 75.505 |
| H | 7.988   | -12.486 | 76.457 |
| C | 9.247   | -13.175 | 74.843 |
| O | 9.209   | -12.764 | 73.647 |
| O | 9.541   | -14.328 | 75.253 |
| C | 2.576   | -4.968  | 80.177 |
| H | 1.604   | -4.497  | 79.978 |
| H | 2.377   | -5.765  | 80.903 |
| C | 3.045   | -5.612  | 78.873 |
| O | 2.262   | -6.621  | 78.493 |
| O | 4.022   | -5.224  | 78.254 |
| C | -9.500  | -8.866  | 68.154 |
| H | -9.430  | -9.579  | 67.320 |
| H | -10.473 | -9.048  | 68.624 |
| C | -8.390  | -9.269  | 69.146 |
| O | -8.610  | -10.275 | 69.879 |
| O | -7.325  | -8.584  | 69.116 |
| O | 0.192   | -11.333 | 64.942 |
| N | 1.183   | -10.627 | 66.834 |
| H | 1.277   | -10.561 | 67.846 |
| O | 1.421   | -4.610  | 67.985 |
| N | 1.797   | -6.556  | 68.975 |
| H | 1.660   | -7.572  | 68.984 |

|   |        |         |        |
|---|--------|---------|--------|
| C | 2.360  | -7.085  | 71.244 |
| H | 2.588  | -6.674  | 72.231 |
| H | 3.209  | -7.692  | 70.919 |
| O | 1.197  | -7.920  | 71.419 |
| H | 2.391  | -9.208  | 73.294 |
| C | 10.558 | -16.868 | 70.867 |
| N | 9.236  | -16.489 | 71.334 |
| C | 9.199  | -15.844 | 72.652 |
| C | 8.163  | -16.796 | 70.562 |
| O | 8.222  | -17.521 | 69.564 |
| C | 6.794  | -16.238 | 70.974 |
| O | 6.793  | -14.889 | 71.458 |
| C | 7.206  | -13.944 | 70.572 |
| O | 7.523  | -14.216 | 69.432 |
| C | 7.201  | -12.568 | 71.197 |
| C | 5.801  | -11.993 | 71.307 |
| C | 5.388  | -10.948 | 70.475 |
| C | 4.140  | -10.340 | 70.609 |
| C | 3.236  | -10.783 | 71.597 |
| C | 3.624  | -11.892 | 72.383 |
| C | 4.884  | -12.467 | 72.256 |
| O | 2.079  | -10.177 | 71.904 |
| C | 1.116  | -9.129  | 70.710 |
| O | 1.595  | -9.241  | 69.557 |
| C | -0.241 | -9.730  | 71.007 |
| C | -0.740 | -9.892  | 72.304 |
| C | -2.032 | -10.369 | 72.508 |
| C | -2.836 | -10.703 | 71.412 |
| C | -2.335 | -10.573 | 70.114 |
| C | -1.049 | -10.072 | 69.921 |
| N | -4.163 | -11.189 | 71.615 |
| C | -5.281 | -10.598 | 71.097 |
| N | -6.473 | -11.172 | 71.304 |
| N | -5.203 | -9.468  | 70.418 |
| H | 10.485 | -17.214 | 69.837 |
| H | 11.229 | -16.002 | 70.927 |
| H | 10.979 | -17.671 | 71.488 |
| H | 9.942  | -16.326 | 73.293 |
| H | 9.420  | -14.772 | 72.627 |
| H | 8.226  | -15.966 | 73.124 |
| H | 6.156  | -16.327 | 70.093 |
| H | 6.370  | -16.826 | 71.793 |
| H | 7.694  | -12.627 | 72.179 |
| H | 7.811  | -11.932 | 70.550 |
| H | 6.076  | -10.574 | 69.719 |
| H | 3.856  | -9.527  | 69.954 |
| H | 2.922  | -12.250 | 73.132 |
| H | 5.172  | -13.290 | 72.904 |
| H | -0.111 | -9.643  | 73.149 |

|   |        |         |        |
|---|--------|---------|--------|
| H | -2.426 | -10.472 | 73.516 |
| H | -2.950 | -10.858 | 69.266 |
| H | -0.660 | -9.939  | 68.918 |
| H | -6.485 | -12.153 | 71.546 |
| H | -7.319 | -10.792 | 70.788 |
| H | -4.316 | -8.987  | 70.370 |
| H | -6.063 | -9.086  | 69.913 |
| H | -4.313 | -11.825 | 72.386 |
| C | -9.347 | -7.428  | 67.632 |
| H | -8.298 | -7.281  | 67.499 |
| H | -9.852 | -7.276  | 66.699 |
| H | -9.719 | -6.731  | 68.354 |
| C | 6.269  | -8.545  | 77.079 |
| H | 6.831  | -8.930  | 77.908 |
| H | 6.760  | -8.817  | 76.167 |
| H | 6.208  | -7.482  | 77.150 |
| C | 3.600  | -3.950  | 80.697 |
| H | 3.251  | -3.416  | 81.557 |
| H | 4.499  | -4.476  | 80.948 |
| H | 3.798  | -3.262  | 79.905 |
| C | 11.276 | -11.308 | 76.443 |
| H | 12.077 | -11.352 | 77.154 |
| H | 11.588 | -11.777 | 75.533 |
| H | 11.025 | -10.287 | 76.254 |
| C | 0.330  | -11.411 | 66.159 |
| C | 1.259  | -5.835  | 67.981 |
| C | 2.076  | -5.961  | 70.249 |
| H | 1.213  | -5.396  | 70.535 |
| H | 2.909  | -5.302  | 70.125 |
| C | -0.600 | -12.485 | 66.752 |
| H | -1.619 | -12.227 | 66.548 |
| H | -0.377 | -13.434 | 66.310 |
| H | -0.452 | -12.541 | 67.810 |
| C | 0.458  | -6.347  | 66.770 |
| H | -0.588 | -6.204  | 66.947 |
| H | 0.748  | -5.805  | 65.895 |
| H | 0.656  | -7.389  | 66.626 |
| H | 1.701  | -9.959  | 66.280 |

Camostat (acyl intermediate)

|   |       |         |        |
|---|-------|---------|--------|
| C | 4.867 | -9.176  | 77.208 |
| H | 4.421 | -8.850  | 78.155 |
| H | 4.985 | -10.265 | 77.277 |
| N | 2.937 | -7.887  | 76.185 |
| H | 2.590 | -7.010  | 77.592 |
| C | 3.905 | -8.876  | 76.104 |
| C | 2.261 | -7.941  | 75.040 |
| H | 1.425 | -7.310  | 74.772 |

|   |         |         |        |
|---|---------|---------|--------|
| N | 2.748   | -8.907  | 74.227 |
| C | 3.790   | -9.513  | 74.891 |
| H | 4.338   | -10.330 | 74.449 |
| C | 10.025  | -12.009 | 77.004 |
| H | 9.686   | -11.463 | 77.898 |
| H | 10.267  | -13.030 | 77.319 |
| C | 8.891   | -12.119 | 75.976 |
| H | 8.715   | -11.158 | 75.476 |
| H | 7.961   | -12.394 | 76.496 |
| C | 9.177   | -13.228 | 74.919 |
| O | 9.106   | -12.891 | 73.702 |
| O | 9.456   | -14.361 | 75.390 |
| C | 2.578   | -4.968  | 80.174 |
| H | 1.605   | -4.498  | 79.975 |
| H | 2.380   | -5.768  | 80.898 |
| C | 3.050   | -5.608  | 78.869 |
| O | 2.268   | -6.614  | 78.483 |
| O | 4.030   | -5.217  | 78.255 |
| C | -9.507  | -8.868  | 68.151 |
| H | -9.447  | -9.574  | 67.310 |
| H | -10.475 | -9.042  | 68.632 |
| C | -8.384  | -9.276  | 69.124 |
| O | -8.657  | -10.132 | 70.012 |
| O | -7.251  | -8.745  | 68.920 |
| O | 0.192   | -11.333 | 64.942 |
| N | 1.183   | -10.627 | 66.834 |
| H | 1.281   | -10.576 | 67.846 |
| O | 1.421   | -4.610  | 67.985 |
| N | 1.797   | -6.556  | 68.975 |
| H | 1.662   | -7.570  | 68.978 |
| C | 2.350   | -7.090  | 71.241 |
| H | 2.596   | -6.692  | 72.228 |
| H | 3.176   | -7.722  | 70.906 |
| O | 1.166   | -7.897  | 71.430 |
| H | 2.369   | -9.264  | 73.319 |
| C | 10.315  | -17.204 | 71.145 |
| N | 9.000   | -16.747 | 71.561 |
| C | 8.957   | -16.063 | 72.859 |
| C | 7.935   | -17.039 | 70.774 |
| O | 7.989   | -17.805 | 69.806 |
| C | 6.578   | -16.409 | 71.115 |
| O | 6.613   | -15.051 | 71.572 |
| C | 7.074   | -14.137 | 70.676 |
| O | 7.419   | -14.446 | 69.554 |
| C | 7.086   | -12.748 | 71.269 |
| C | 5.696   | -12.148 | 71.393 |
| C | 5.291   | -11.104 | 70.555 |
| C | 4.059   | -10.469 | 70.703 |
| C | 3.156   | -10.873 | 71.712 |

|   |        |         |        |
|---|--------|---------|--------|
| C | 3.539  | -11.983 | 72.506 |
| C | 4.784  | -12.586 | 72.365 |
| O | 2.026  | -10.233 | 72.004 |
| C | 1.012  | -9.064  | 70.708 |
| O | 1.515  | -9.233  | 69.584 |
| C | -0.314 | -9.678  | 71.057 |
| C | -0.828 | -9.687  | 72.359 |
| C | -2.113 | -10.162 | 72.604 |
| C | -2.890 | -10.651 | 71.547 |
| C | -2.366 | -10.687 | 70.252 |
| C | -1.089 | -10.185 | 70.012 |
| N | -4.224 | -11.102 | 71.781 |
| C | -5.322 | -10.533 | 71.195 |
| N | -6.534 | -11.032 | 71.464 |
| N | -5.203 | -9.493  | 70.390 |
| H | 10.262 | -17.549 | 70.113 |
| H | 11.029 | -16.377 | 71.229 |
| H | 10.667 | -18.028 | 71.782 |
| H | 9.625  | -16.586 | 73.549 |
| H | 9.272  | -15.015 | 72.811 |
| H | 7.954  | -16.086 | 73.281 |
| H | 5.978  | -16.489 | 70.208 |
| H | 6.092  | -16.961 | 71.925 |
| H | 7.593  | -12.793 | 72.245 |
| H | 7.695  | -12.132 | 70.603 |
| H | 5.975  | -10.753 | 69.783 |
| H | 3.784  | -9.655  | 70.043 |
| H | 2.845  | -12.316 | 73.274 |
| H | 5.064  | -13.406 | 73.022 |
| H | -0.220 | -9.312  | 73.172 |
| H | -2.523 | -10.139 | 73.609 |
| H | -2.962 | -11.093 | 69.441 |
| H | -0.688 | -10.170 | 69.006 |
| H | -6.587 | -11.974 | 71.826 |
| H | -7.370 | -10.664 | 70.926 |
| H | -4.295 | -9.065  | 70.277 |
| H | -6.041 | -9.166  | 69.809 |
| H | -4.395 | -11.618 | 72.634 |
| C | -9.347 | -7.428  | 67.632 |
| H | -8.298 | -7.281  | 67.499 |
| H | -9.852 | -7.276  | 66.699 |
| H | -9.719 | -6.731  | 68.354 |
| C | 6.269  | -8.545  | 77.079 |
| H | 6.831  | -8.930  | 77.908 |
| H | 6.760  | -8.817  | 76.167 |
| H | 6.208  | -7.482  | 77.150 |
| C | 3.600  | -3.950  | 80.697 |
| H | 3.251  | -3.416  | 81.557 |
| H | 4.499  | -4.476  | 80.948 |

|   |        |         |        |
|---|--------|---------|--------|
| H | 3.798  | -3.262  | 79.905 |
| C | 11.276 | -11.308 | 76.443 |
| H | 12.077 | -11.352 | 77.154 |
| H | 11.588 | -11.777 | 75.533 |
| H | 11.025 | -10.287 | 76.254 |
| C | 0.330  | -11.411 | 66.159 |
| C | 1.259  | -5.835  | 67.981 |
| C | 2.076  | -5.961  | 70.249 |
| H | 1.213  | -5.396  | 70.535 |
| H | 2.909  | -5.302  | 70.125 |
| C | -0.600 | -12.485 | 66.752 |
| H | -1.619 | -12.227 | 66.548 |
| H | -0.377 | -13.434 | 66.310 |
| H | -0.452 | -12.541 | 67.810 |
| C | 0.458  | -6.347  | 66.770 |
| H | -0.588 | -6.204  | 66.947 |
| H | 0.748  | -5.805  | 65.895 |
| H | 0.656  | -7.389  | 66.626 |
| H | 1.705  | -9.960  | 66.283 |

Compound **1** (reactant)

|   |         |         |        |
|---|---------|---------|--------|
| C | 5.183   | -9.265  | 76.290 |
| H | 4.702   | -9.198  | 77.274 |
| H | 5.292   | -10.335 | 76.069 |
| N | 3.485   | -7.566  | 75.585 |
| H | 3.493   | -7.044  | 76.522 |
| C | 4.250   | -8.669  | 75.281 |
| C | 2.679   | -7.318  | 74.535 |
| H | 1.963   | -6.511  | 74.545 |
| N | 2.875   | -8.193  | 73.548 |
| C | 3.863   | -9.044  | 74.009 |
| H | 4.221   | -9.870  | 73.411 |
| C | 10.487  | -11.788 | 76.653 |
| H | 9.762   | -11.229 | 77.260 |
| H | 10.820  | -12.648 | 77.243 |
| C | 9.812   | -12.316 | 75.383 |
| H | 9.496   | -11.482 | 74.743 |
| H | 8.895   | -12.867 | 75.638 |
| C | 10.712  | -13.285 | 74.576 |
| O | 10.489  | -13.343 | 73.296 |
| O | 11.550  | -13.964 | 75.177 |
| C | 2.230   | -4.821  | 79.211 |
| H | 1.578   | -3.981  | 78.946 |
| H | 1.650   | -5.456  | 79.898 |
| C | 2.492   | -5.631  | 77.929 |
| O | 1.670   | -5.525  | 76.992 |
| O | 3.539   | -6.365  | 77.940 |
| C | -10.094 | -8.600  | 67.040 |



|   |         |         |        |
|---|---------|---------|--------|
| H | -9.665  | -9.085  | 66.159 |
| H | -11.179 | -8.763  | 67.029 |
| C | -9.483  | -9.213  | 68.301 |
| O | -8.574  | -10.081 | 68.147 |
| O | -9.871  | -8.729  | 69.407 |
| O | 0.666   | -11.251 | 64.082 |
| N | 0.555   | -10.300 | 66.163 |
| H | 0.226   | -10.291 | 67.121 |
| O | 0.765   | -4.297  | 67.612 |
| N | 0.991   | -6.188  | 68.822 |
| H | 0.848   | -7.197  | 68.773 |
| C | 2.461   | -6.976  | 70.611 |
| H | 3.210   | -6.601  | 71.322 |
| H | 2.998   | -7.640  | 69.906 |
| O | 1.441   | -7.667  | 71.292 |
| H | 1.881   | -8.004  | 72.129 |
| C | -1.926  | -7.843  | 70.086 |
| C | -3.229  | -7.437  | 70.354 |
| C | -4.180  | -8.368  | 70.792 |
| C | -3.820  | -9.708  | 70.968 |
| C | -2.521  | -10.111 | 70.685 |
| C | -1.564  | -9.185  | 70.249 |
| C | -0.160  | -9.624  | 69.979 |
| O | 0.465   | -9.297  | 68.965 |
| C | 1.601   | -10.972 | 71.149 |
| C | 2.705   | -10.607 | 70.402 |
| C | 3.980   | -11.113 | 70.749 |
| C | 4.109   | -12.033 | 71.840 |
| C | 2.948   | -12.409 | 72.563 |
| C | 1.729   | -11.888 | 72.230 |
| C | 5.388   | -12.501 | 72.205 |
| C | 6.519   | -12.062 | 71.541 |
| C | 6.398   | -11.145 | 70.462 |
| C | 5.159   | -10.698 | 70.071 |
| C | 7.839   | -12.511 | 72.012 |
| N | 8.880   | -11.690 | 72.025 |
| N | 8.008   | -13.748 | 72.459 |
| N | -5.503  | -7.948  | 71.077 |
| C | -6.632  | -8.541  | 70.572 |
| N | -7.821  | -8.097  | 70.960 |
| N | -6.543  | -9.562  | 69.727 |
| H | -1.181  | -7.121  | 69.770 |
| H | -3.512  | -6.397  | 70.224 |
| H | -4.551  | -10.424 | 71.326 |
| H | -2.256  | -11.157 | 70.801 |
| H | 2.597   | -9.907  | 69.587 |
| H | 3.042   | -13.098 | 73.398 |
| H | 0.843   | -12.161 | 72.798 |
| H | 5.477   | -13.165 | 73.060 |

|   |         |         |        |
|---|---------|---------|--------|
| H | 7.289   | -10.821 | 69.932 |
| H | 5.066   | -10.004 | 69.241 |
| H | 8.728   | -10.699 | 71.906 |
| H | 7.293   | -14.444 | 72.315 |
| H | 8.947   | -13.966 | 72.861 |
| H | -7.887  | -7.405  | 71.692 |
| H | -8.694  | -8.413  | 70.438 |
| H | -5.655  | -9.711  | 69.267 |
| H | -7.417  | -9.892  | 69.206 |
| H | -5.615  | -7.005  | 71.426 |
| H | 9.737   | -12.083 | 72.508 |
| C | -9.796  | -7.087  | 67.059 |
| H | -8.753  | -6.936  | 67.244 |
| H | -10.065 | -6.622  | 66.134 |
| H | -10.365 | -6.653  | 67.855 |
| C | 3.500   | -4.321  | 79.917 |
| H | 3.211   | -3.639  | 80.690 |
| H | 4.044   | -5.136  | 80.345 |
| H | 4.119   | -3.811  | 79.207 |
| C | 11.695  | -10.905 | 76.303 |
| H | 12.275  | -10.665 | 77.170 |
| H | 12.297  | -11.465 | 75.617 |
| H | 11.364  | -10.004 | 75.834 |
| C | 6.600   | -8.655  | 76.397 |
| H | 6.588   | -7.615  | 76.651 |
| H | 7.103   | -9.203  | 77.167 |
| H | 7.118   | -8.790  | 75.470 |
| C | 1.932   | -5.784  | 69.825 |
| H | 1.229   | -5.227  | 70.408 |
| H | 2.781   | -5.170  | 69.607 |
| C | 0.549   | -5.492  | 67.754 |
| C | -0.280  | -6.028  | 66.572 |
| H | -1.098  | -5.365  | 66.380 |
| H | 0.340   | -6.091  | 65.702 |
| H | -0.657  | -7.000  | 66.812 |
| C | 0.239   | -11.206 | 65.233 |
| C | -0.751  | -12.368 | 65.438 |
| H | -1.582  | -12.249 | 64.774 |
| H | -0.260  | -13.296 | 65.232 |
| H | -1.100  | -12.365 | 66.450 |
| H | 1.225   | -9.587  | 65.907 |
| N | 0.312   | -10.463 | 70.948 |
| H | -0.296  | -10.560 | 71.750 |

Compound **1** (TS1)

|   |       |         |        |
|---|-------|---------|--------|
| C | 5.175 | -9.244  | 76.252 |
| H | 4.682 | -9.227  | 77.231 |
| H | 5.268 | -10.300 | 75.969 |

|   |         |         |        |
|---|---------|---------|--------|
| N | 3.495   | -7.482  | 75.655 |
| H | 3.499   | -6.958  | 76.704 |
| C | 4.250   | -8.575  | 75.274 |
| C | 2.687   | -7.153  | 74.650 |
| H | 1.974   | -6.345  | 74.700 |
| N | 2.887   | -7.984  | 73.615 |
| C | 3.871   | -8.885  | 73.987 |
| H | 4.204   | -9.664  | 73.322 |
| C | 10.506  | -11.806 | 76.685 |
| H | 9.708   | -11.214 | 77.155 |
| H | 10.839  | -12.548 | 77.418 |
| C | 9.960   | -12.563 | 75.472 |
| H | 9.688   | -11.861 | 74.672 |
| H | 9.032   | -13.092 | 75.734 |
| C | 10.949  | -13.622 | 74.915 |
| O | 10.729  | -14.023 | 73.699 |
| O | 11.851  | -14.042 | 75.645 |
| C | 2.223   | -4.814  | 79.213 |
| H | 1.556   | -3.976  | 78.989 |
| H | 1.669   | -5.487  | 79.883 |
| C | 2.473   | -5.561  | 77.900 |
| O | 1.724   | -5.354  | 76.928 |
| O | 3.471   | -6.383  | 77.914 |
| C | -10.029 | -8.618  | 67.047 |
| H | -9.754  | -9.051  | 66.082 |
| H | -11.080 | -8.851  | 67.253 |
| C | -9.115  | -9.194  | 68.132 |
| O | -8.071  | -9.795  | 67.738 |
| O | -9.408  | -8.913  | 69.332 |
| O | 0.666   | -11.251 | 64.082 |
| N | 0.555   | -10.300 | 66.163 |
| H | 0.306   | -10.358 | 67.143 |
| O | 0.765   | -4.297  | 67.612 |
| N | 0.991   | -6.188  | 68.822 |
| H | 0.886   | -7.202  | 68.756 |
| C | 2.458   | -7.013  | 70.589 |
| H | 3.295   | -6.656  | 71.220 |
| H | 2.917   | -7.675  | 69.827 |
| O | 1.528   | -7.691  | 71.362 |
| H | 2.319   | -7.951  | 72.688 |
| C | -1.298  | -7.636  | 70.986 |
| C | -2.665  | -7.397  | 71.124 |
| C | -3.599  | -8.372  | 70.754 |
| C | -3.156  | -9.586  | 70.213 |
| C | -1.792  | -9.798  | 70.045 |
| C | -0.850  | -8.841  | 70.443 |
| C | 0.603   | -9.252  | 70.281 |
| O | 1.157   | -9.221  | 69.166 |
| C | 2.114   | -10.855 | 71.484 |

|   |         |         |        |
|---|---------|---------|--------|
| C | 3.237   | -10.701 | 70.681 |
| C | 4.450   | -11.330 | 71.033 |
| C | 4.520   | -12.148 | 72.211 |
| C | 3.348   | -12.308 | 72.998 |
| C | 2.185   | -11.681 | 72.647 |
| C | 5.745   | -12.738 | 72.575 |
| C | 6.887   | -12.539 | 71.816 |
| C | 6.822   | -11.737 | 70.642 |
| C | 5.636   | -11.160 | 70.263 |
| C | 8.160   | -13.099 | 72.280 |
| N | 9.310   | -12.465 | 72.063 |
| N | 8.203   | -14.240 | 72.953 |
| N | -4.972  | -8.131  | 71.017 |
| C | -6.054  | -8.587  | 70.316 |
| N | -7.262  | -8.475  | 70.862 |
| N | -5.919  | -9.130  | 69.114 |
| H | -0.556  | -6.921  | 71.317 |
| H | -3.009  | -6.455  | 71.543 |
| H | -3.862  | -10.367 | 69.960 |
| H | -1.452  | -10.746 | 69.638 |
| H | 3.174   | -10.084 | 69.795 |
| H | 3.391   | -12.921 | 73.894 |
| H | 1.296   | -11.796 | 73.261 |
| H | 5.792   | -13.310 | 73.497 |
| H | 7.711   | -11.609 | 70.032 |
| H | 5.587   | -10.555 | 69.362 |
| H | 9.288   | -11.495 | 71.783 |
| H | 7.387   | -14.827 | 73.017 |
| H | 9.129   | -14.480 | 73.383 |
| H | -7.345  | -8.283  | 71.850 |
| H | -8.132  | -8.720  | 70.296 |
| H | -5.056  | -8.981  | 68.610 |
| H | -6.781  | -9.484  | 68.592 |
| H | -5.174  | -7.466  | 71.751 |
| H | 10.129  | -12.868 | 72.583 |
| C | -9.796  | -7.087  | 67.059 |
| H | -8.753  | -6.936  | 67.244 |
| H | -10.065 | -6.622  | 66.134 |
| H | -10.365 | -6.653  | 67.855 |
| C | 3.500   | -4.321  | 79.917 |
| H | 3.211   | -3.639  | 80.690 |
| H | 4.044   | -5.136  | 80.345 |
| H | 4.119   | -3.811  | 79.207 |
| C | 11.695  | -10.905 | 76.303 |
| H | 12.275  | -10.665 | 77.170 |
| H | 12.297  | -11.465 | 75.617 |
| H | 11.364  | -10.004 | 75.834 |
| C | 6.600   | -8.655  | 76.397 |
| H | 6.588   | -7.615  | 76.651 |

|   |        |         |        |
|---|--------|---------|--------|
| H | 7.103  | -9.203  | 77.167 |
| H | 7.118  | -8.790  | 75.470 |
| C | 1.932  | -5.784  | 69.825 |
| H | 1.229  | -5.227  | 70.408 |
| H | 2.781  | -5.170  | 69.607 |
| C | 0.549  | -5.492  | 67.754 |
| C | -0.280 | -6.028  | 66.572 |
| H | -1.098 | -5.365  | 66.380 |
| H | 0.340  | -6.091  | 65.702 |
| H | -0.657 | -7.000  | 66.812 |
| C | 0.239  | -11.206 | 65.233 |
| C | -0.751 | -12.368 | 65.438 |
| H | -1.582 | -12.249 | 64.774 |
| H | -0.260 | -13.296 | 65.232 |
| H | -1.100 | -12.365 | 66.450 |
| H | 1.265  | -9.620  | 65.926 |
| N | 0.895  | -10.253 | 71.235 |
| H | 0.281  | -10.217 | 72.039 |

Compound **1** (tetrahedral intermediate)

|   |         |         |        |
|---|---------|---------|--------|
| C | 5.192   | -9.280  | 76.265 |
| H | 4.700   | -9.258  | 77.246 |
| H | 5.318   | -10.339 | 76.007 |
| N | 3.528   | -7.531  | 75.615 |
| H | 3.496   | -6.797  | 77.010 |
| C | 4.255   | -8.655  | 75.275 |
| C | 2.720   | -7.268  | 74.601 |
| H | 2.004   | -6.461  | 74.577 |
| N | 2.896   | -8.169  | 73.605 |
| C | 3.873   | -9.057  | 74.015 |
| H | 4.190   | -9.879  | 73.396 |
| C | 10.502  | -11.801 | 76.685 |
| H | 9.712   | -11.206 | 77.164 |
| H | 10.834  | -12.551 | 77.410 |
| C | 9.941   | -12.544 | 75.470 |
| H | 9.680   | -11.836 | 74.672 |
| H | 9.003   | -13.057 | 75.731 |
| C | 10.908  | -13.621 | 74.908 |
| O | 10.662  | -14.029 | 73.700 |
| O | 11.818  | -14.044 | 75.627 |
| C | 2.201   | -4.793  | 79.240 |
| H | 1.532   | -3.950  | 79.046 |
| H | 1.661   | -5.478  | 79.910 |
| C | 2.404   | -5.506  | 77.919 |
| O | 1.679   | -5.323  | 76.949 |
| O | 3.434   | -6.340  | 77.939 |
| C | -10.017 | -8.621  | 67.046 |
| H | -9.752  | -9.046  | 66.074 |

|   |         |         |        |
|---|---------|---------|--------|
| H | -11.061 | -8.865  | 67.269 |
| C | -9.076  | -9.188  | 68.113 |
| O | -8.008  | -9.730  | 67.699 |
| O | -9.376  | -8.955  | 69.322 |
| O | 0.666   | -11.251 | 64.082 |
| N | 0.555   | -10.300 | 66.163 |
| H | 0.321   | -10.351 | 67.148 |
| O | 0.765   | -4.297  | 67.612 |
| N | 0.991   | -6.188  | 68.822 |
| H | 0.915   | -7.214  | 68.739 |
| C | 2.445   | -7.034  | 70.542 |
| H | 3.166   | -6.727  | 71.309 |
| H | 2.968   | -7.659  | 69.810 |
| O | 1.450   | -7.798  | 71.208 |
| H | 2.350   | -8.192  | 72.728 |
| C | -1.316  | -7.451  | 71.122 |
| C | -2.696  | -7.286  | 71.243 |
| C | -3.571  | -8.278  | 70.790 |
| C | -3.052  | -9.423  | 70.168 |
| C | -1.675  | -9.551  | 70.016 |
| C | -0.787  | -8.589  | 70.512 |
| C | 0.717   | -8.906  | 70.375 |
| O | 1.156   | -9.008  | 69.164 |
| C | 2.056   | -10.794 | 71.448 |
| C | 3.202   | -10.641 | 70.665 |
| C | 4.391   | -11.315 | 70.998 |
| C | 4.428   | -12.198 | 72.132 |
| C | 3.232   | -12.385 | 72.879 |
| C | 2.091   | -11.709 | 72.552 |
| C | 5.640   | -12.805 | 72.501 |
| C | 6.808   | -12.571 | 71.789 |
| C | 6.770   | -11.723 | 70.645 |
| C | 5.597   | -11.126 | 70.260 |
| C | 8.072   | -13.124 | 72.273 |
| N | 9.225   | -12.490 | 72.064 |
| N | 8.117   | -14.261 | 72.958 |
| N | -4.958  | -8.128  | 71.056 |
| C | -6.016  | -8.581  | 70.321 |
| N | -7.231  | -8.552  | 70.866 |
| N | -5.857  | -9.041  | 69.087 |
| H | -0.640  | -6.702  | 71.516 |
| H | -3.097  | -6.392  | 71.716 |
| H | -3.711  | -10.219 | 69.842 |
| H | -1.271  | -10.441 | 69.543 |
| H | 3.156   | -9.988  | 69.803 |
| H | 3.245   | -13.056 | 73.735 |
| H | 1.190   | -11.842 | 73.145 |
| H | 5.660   | -13.415 | 73.401 |
| H | 7.673   | -11.574 | 70.060 |

|   |         |         |        |
|---|---------|---------|--------|
| H | 5.573   | -10.485 | 69.384 |
| H | 9.204   | -11.520 | 71.785 |
| H | 7.309   | -14.862 | 73.005 |
| H | 9.037   | -14.498 | 73.391 |
| H | -7.323  | -8.427  | 71.863 |
| H | -8.093  | -8.787  | 70.284 |
| H | -4.997  | -8.835  | 68.598 |
| H | -6.704  | -9.399  | 68.548 |
| H | -5.194  | -7.534  | 71.838 |
| H | 10.041  | -12.889 | 72.592 |
| C | -9.796  | -7.087  | 67.059 |
| H | -8.753  | -6.936  | 67.244 |
| H | -10.065 | -6.622  | 66.134 |
| H | -10.365 | -6.653  | 67.855 |
| C | 3.500   | -4.321  | 79.917 |
| H | 3.211   | -3.639  | 80.690 |
| H | 4.044   | -5.136  | 80.345 |
| H | 4.119   | -3.811  | 79.207 |
| C | 11.695  | -10.905 | 76.303 |
| H | 12.275  | -10.665 | 77.170 |
| H | 12.297  | -11.465 | 75.617 |
| H | 11.364  | -10.004 | 75.834 |
| C | 6.600   | -8.655  | 76.397 |
| H | 6.588   | -7.615  | 76.651 |
| H | 7.103   | -9.203  | 77.167 |
| H | 7.118   | -8.790  | 75.470 |
| C | 1.932   | -5.784  | 69.825 |
| H | 1.229   | -5.227  | 70.408 |
| H | 2.781   | -5.170  | 69.607 |
| C | 0.549   | -5.492  | 67.754 |
| C | -0.280  | -6.028  | 66.572 |
| H | -1.098  | -5.365  | 66.380 |
| H | 0.340   | -6.091  | 65.702 |
| H | -0.657  | -7.000  | 66.812 |
| C | 0.239   | -11.206 | 65.233 |
| C | -0.751  | -12.368 | 65.438 |
| H | -1.582  | -12.249 | 64.774 |
| H | -0.260  | -13.296 | 65.232 |
| H | -1.100  | -12.365 | 66.450 |
| H | 1.264   | -9.621  | 65.920 |
| N | 0.885   | -10.125 | 71.223 |
| H | 0.227   | -10.170 | 71.991 |

**Compound 1 (TS2)**

|   |       |         |        |
|---|-------|---------|--------|
| C | 5.188 | -9.278  | 76.333 |
| H | 4.730 | -9.187  | 77.328 |
| H | 5.300 | -10.353 | 76.147 |
| N | 3.581 | -7.522  | 75.506 |

|   |         |         |        |
|---|---------|---------|--------|
| H | 3.586   | -6.650  | 76.877 |
| C | 4.215   | -8.739  | 75.331 |
| C | 2.697   | -7.408  | 74.526 |
| H | 2.008   | -6.586  | 74.405 |
| N | 2.741   | -8.490  | 73.709 |
| C | 3.699   | -9.349  | 74.213 |
| H | 3.914   | -10.297 | 73.750 |
| C | 10.503  | -11.805 | 76.683 |
| H | 9.698   | -11.208 | 77.134 |
| H | 10.829  | -12.536 | 77.429 |
| C | 9.976   | -12.584 | 75.476 |
| H | 9.733   | -11.900 | 74.652 |
| H | 9.034   | -13.094 | 75.726 |
| C | 10.964  | -13.672 | 74.971 |
| O | 10.765  | -14.107 | 73.767 |
| O | 11.848  | -14.073 | 75.736 |
| C | 2.219   | -4.809  | 79.216 |
| H | 1.526   | -3.980  | 79.043 |
| H | 1.688   | -5.526  | 79.858 |
| C | 2.426   | -5.479  | 77.867 |
| O | 1.621   | -5.375  | 76.951 |
| O | 3.545   | -6.191  | 77.800 |
| C | -9.998  | -8.625  | 67.033 |
| H | -9.777  | -9.019  | 66.037 |
| H | -11.023 | -8.896  | 67.303 |
| C | -8.992  | -9.222  | 68.025 |
| O | -7.851  | -9.505  | 67.549 |
| O | -9.332  | -9.286  | 69.242 |
| O | 0.666   | -11.251 | 64.082 |
| N | 0.553   | -10.300 | 66.164 |
| H | 0.323   | -10.387 | 67.146 |
| O | 0.765   | -4.297  | 67.612 |
| N | 0.991   | -6.188  | 68.822 |
| H | 0.906   | -7.201  | 68.727 |
| C | 2.348   | -7.021  | 70.616 |
| H | 2.979   | -6.733  | 71.461 |
| H | 2.897   | -7.725  | 69.984 |
| O | 1.193   | -7.661  | 71.174 |
| H | 2.095   | -8.711  | 72.943 |
| C | -1.508  | -7.986  | 71.648 |
| C | -2.884  | -8.089  | 71.842 |
| C | -3.626  | -9.047  | 71.143 |
| C | -2.976  | -9.901  | 70.240 |
| C | -1.607  | -9.768  | 70.033 |
| C | -0.857  | -8.818  | 70.734 |
| C | 0.630   | -8.746  | 70.470 |
| O | 1.085   | -9.073  | 69.355 |
| C | 2.087   | -11.011 | 71.785 |
| C | 3.241   | -10.755 | 71.008 |



|   |                |        |
|---|----------------|--------|
| C | 4.420 -11.480  | 71.195 |
| C | 4.467 -12.551  | 72.161 |
| C | 3.259 -12.893  | 72.838 |
| C | 2.114 -12.176  | 72.642 |
| C | 5.687 -13.170  | 72.455 |
| C | 6.870 -12.791  | 71.822 |
| C | 6.813 -11.785  | 70.810 |
| C | 5.632 -11.166  | 70.502 |
| C | 8.146 -13.319  | 72.276 |
| N | 9.282 -12.638  | 72.088 |
| N | 8.247 -14.480  | 72.920 |
| N | -5.016 -9.169  | 71.414 |
| C | -6.024 -9.313  | 70.498 |
| N | -7.266 -9.489  | 70.940 |
| N | -5.787 -9.286  | 69.195 |
| H | -0.936 -7.244  | 72.192 |
| H | -3.387 -7.421  | 72.537 |
| H | -3.535 -10.673 | 69.723 |
| H | -1.095 -10.426 | 69.341 |
| H | 3.218 -9.938   | 70.297 |
| H | 3.269 -13.728  | 73.536 |
| H | 1.209 -12.429  | 73.189 |
| H | 5.705 -13.910  | 73.251 |
| H | 7.715 -11.527  | 70.262 |
| H | 5.603 -10.399  | 69.733 |
| H | 9.218 -11.651  | 71.884 |
| H | 7.465 -15.113  | 72.967 |
| H | 9.161 -14.675  | 73.377 |
| H | -7.422 -9.704  | 71.914 |
| H | -8.093 -9.471  | 70.264 |
| H | -4.896 -8.942  | 68.866 |
| H | -6.603 -9.423  | 68.516 |
| H | -5.311 -8.868  | 72.333 |
| H | 10.099 -13.010 | 72.631 |
| C | -9.796 -7.087  | 67.059 |
| H | -8.753 -6.936  | 67.244 |
| H | -10.065 -6.622 | 66.134 |
| H | -10.365 -6.653 | 67.855 |
| C | 3.500 -4.321   | 79.917 |
| H | 3.211 -3.639   | 80.690 |
| H | 4.044 -5.136   | 80.345 |
| H | 4.119 -3.811   | 79.207 |
| C | 11.695 -10.905 | 76.304 |
| H | 12.275 -10.665 | 77.170 |
| H | 12.297 -11.465 | 75.617 |
| H | 11.364 -10.004 | 75.834 |
| C | 6.600 -8.655   | 76.397 |
| H | 6.588 -7.615   | 76.652 |
| H | 7.103 -9.203   | 77.167 |

|   |        |         |        |
|---|--------|---------|--------|
| H | 7.118  | -8.790  | 75.470 |
| C | 1.933  | -5.784  | 69.824 |
| H | 1.229  | -5.227  | 70.408 |
| H | 2.781  | -5.170  | 69.607 |
| C | 0.549  | -5.492  | 67.754 |
| C | -0.280 | -6.028  | 66.572 |
| H | -1.098 | -5.365  | 66.380 |
| H | 0.340  | -6.091  | 65.702 |
| H | -0.657 | -7.000  | 66.812 |
| C | 0.241  | -11.206 | 65.232 |
| C | -0.751 | -12.368 | 65.438 |
| H | -1.582 | -12.249 | 64.774 |
| H | -0.260 | -13.296 | 65.232 |
| H | -1.100 | -12.365 | 66.450 |
| H | 1.280  | -9.635  | 65.935 |
| N | 1.057  | -10.152 | 71.818 |
| H | 0.255  | -10.497 | 72.341 |

Compound **1** (acyl intermediate)

|   |         |         |        |
|---|---------|---------|--------|
| C | 5.189   | -9.279  | 76.367 |
| H | 4.750   | -9.164  | 77.367 |
| H | 5.301   | -10.358 | 76.208 |
| N | 3.531   | -7.572  | 75.513 |
| H | 3.554   | -6.657  | 76.863 |
| C | 4.190   | -8.781  | 75.371 |
| C | 2.616   | -7.526  | 74.554 |
| H | 1.898   | -6.730  | 74.421 |
| N | 2.666   | -8.639  | 73.780 |
| C | 3.658   | -9.450  | 74.296 |
| H | 3.883   | -10.414 | 73.873 |
| C | 10.500  | -11.800 | 76.686 |
| H | 9.690   | -11.194 | 77.117 |
| H | 10.817  | -12.516 | 77.451 |
| C | 9.984   | -12.604 | 75.491 |
| H | 9.772   | -11.941 | 74.641 |
| H | 9.026   | -13.089 | 75.733 |
| C | 10.959  | -13.725 | 75.034 |
| O | 10.727  | -14.236 | 73.868 |
| O | 11.864  | -14.078 | 75.801 |
| C | 2.217   | -4.809  | 79.218 |
| H | 1.526   | -3.978  | 79.047 |
| H | 1.686   | -5.522  | 79.864 |
| C | 2.409   | -5.485  | 77.869 |
| O | 1.583   | -5.396  | 76.970 |
| O | 3.533   | -6.186  | 77.780 |
| C | -9.990  | -8.627  | 67.039 |
| H | -9.772  | -9.018  | 66.041 |
| H | -11.013 | -8.903  | 67.313 |

|   |        |         |        |
|---|--------|---------|--------|
| C | -8.978 | -9.227  | 68.023 |
| O | -7.814 | -9.424  | 67.556 |
| O | -9.337 | -9.389  | 69.225 |
| O | 0.666  | -11.251 | 64.082 |
| N | 0.555  | -10.300 | 66.163 |
| H | 0.329  | -10.401 | 67.144 |
| O | 0.765  | -4.297  | 67.612 |
| N | 0.991  | -6.188  | 68.822 |
| H | 0.958  | -7.193  | 68.671 |
| C | 2.301  | -7.026  | 70.638 |
| H | 2.880  | -6.758  | 71.522 |
| H | 2.852  | -7.762  | 70.049 |
| O | 1.081  | -7.627  | 71.140 |
| H | 1.974  | -8.968  | 73.080 |
| C | -1.600 | -8.038  | 71.714 |
| C | -2.963 | -8.215  | 71.937 |
| C | -3.672 | -9.194  | 71.232 |
| C | -2.997 | -10.016 | 70.317 |
| C | -1.642 | -9.818  | 70.085 |
| C | -0.930 | -8.829  | 70.775 |
| C | 0.491  | -8.599  | 70.403 |
| O | 0.998  | -9.072  | 69.390 |
| C | 1.941  | -11.262 | 72.168 |
| C | 3.064  | -11.056 | 71.313 |
| C | 4.243  | -11.775 | 71.459 |
| C | 4.339  | -12.820 | 72.458 |
| C | 3.159  | -13.137 | 73.201 |
| C | 2.010  | -12.420 | 73.045 |
| C | 5.569  | -13.426 | 72.715 |
| C | 6.729  | -13.066 | 72.021 |
| C | 6.619  | -12.098 | 70.974 |
| C | 5.425  | -11.493 | 70.697 |
| C | 8.021  | -13.563 | 72.438 |
| N | 9.151  | -12.902 | 72.139 |
| N | 8.166  | -14.680 | 73.153 |
| N | -5.057 | -9.367  | 71.491 |
| C | -6.051 | -9.460  | 70.549 |
| N | -7.302 | -9.654  | 70.960 |
| N | -5.791 | -9.369  | 69.254 |
| H | -1.057 | -7.270  | 72.251 |
| H | -3.484 | -7.577  | 72.645 |
| H | -3.531 | -10.808 | 69.804 |
| H | -1.110 | -10.446 | 69.380 |
| H | 3.010  | -10.251 | 70.587 |
| H | 3.203  | -13.954 | 73.920 |
| H | 1.133  | -12.655 | 73.645 |
| H | 5.622  | -14.139 | 73.534 |
| H | 7.493  | -11.861 | 70.374 |
| H | 5.360  | -10.756 | 69.899 |

|   |         |         |        |
|---|---------|---------|--------|
| H | 9.072   | -11.925 | 71.898 |
| H | 7.390   | -15.307 | 73.292 |
| H | 9.100   | -14.838 | 73.581 |
| H | -7.476  | -9.913  | 71.920 |
| H | -8.114  | -9.608  | 70.268 |
| H | -4.892  | -9.015  | 68.960 |
| H | -6.600  | -9.443  | 68.553 |
| H | -5.368  | -9.096  | 72.414 |
| H | 9.989   | -13.230 | 72.674 |
| C | -9.796  | -7.087  | 67.059 |
| H | -8.753  | -6.936  | 67.244 |
| H | -10.065 | -6.622  | 66.134 |
| H | -10.365 | -6.653  | 67.855 |
| C | 3.500   | -4.321  | 79.917 |
| H | 3.211   | -3.639  | 80.690 |
| H | 4.044   | -5.136  | 80.345 |
| H | 4.119   | -3.811  | 79.207 |
| C | 11.695  | -10.905 | 76.303 |
| H | 12.275  | -10.665 | 77.170 |
| H | 12.297  | -11.465 | 75.617 |
| H | 11.364  | -10.004 | 75.834 |
| C | 6.600   | -8.655  | 76.397 |
| H | 6.588   | -7.615  | 76.651 |
| H | 7.103   | -9.203  | 77.167 |
| H | 7.118   | -8.790  | 75.470 |
| C | 1.932   | -5.784  | 69.825 |
| H | 1.229   | -5.227  | 70.408 |
| H | 2.781   | -5.170  | 69.607 |
| C | 0.549   | -5.492  | 67.754 |
| C | -0.280  | -6.028  | 66.572 |
| H | -1.098  | -5.365  | 66.380 |
| H | 0.340   | -6.091  | 65.702 |
| H | -0.657  | -7.000  | 66.812 |
| C | 0.239   | -11.206 | 65.233 |
| C | -0.751  | -12.368 | 65.438 |
| H | -1.582  | -12.249 | 64.774 |
| H | -0.260  | -13.296 | 65.232 |
| H | -1.100  | -12.365 | 66.450 |
| H | 1.295   | -9.648  | 65.936 |
| N | 0.953   | -10.371 | 72.207 |
| H | 0.222   | -10.678 | 72.854 |
